# Supplementary material for: Improved Shear Strength Prediction Model of Steel Fiber Reinforced Concrete Beams by Adopting Gene Expression Programming
Source: MDPI journal article supplement (doi:10.3390/ma15113758), 2022-05-24
Supplement: s1 [file s1]

**Table S1: Properties of SFRC beam**

| <i>Reference</i>                                            | <i>ID</i>         | $b_w$ | $h$  | $d$  | $l_{span}$ | $\rho$ | $a/d$ | $a_v/d$ | $d_a$ | $f_{c,cyl}$ | <i>Fiber Type</i> | $V_f$ |
|-------------------------------------------------------------|-------------------|-------|------|------|------------|--------|-------|---------|-------|-------------|-------------------|-------|
|                                                             |                   | (mm)  | (mm) | (mm) | (mm)       | (-)    | (-)   | (-)     | (mm)  | (MPa)       |                   | (%)   |
| <b><i>Singh &amp; Jain<br/>2014</i></b>                     | <i>D-I</i>        | 150   | 300  | 251  | 1470       | 0.0267 | 3.49  | 3.09    | 12.5  | 28.1        | <i>hooked</i>     | 0.75  |
|                                                             | <i>D-II</i>       | 150   | 300  | 251  | 1470       | 0.0267 | 3.49  | 3.09    | 12.5  | 25.3        | <i>hooked</i>     | 0.75  |
|                                                             | <i>E-I</i>        | 150   | 300  | 251  | 1470       | 0.0267 | 3.49  | 3.09    | 12.5  | 27.9        | <i>hooked</i>     | 1     |
|                                                             | <i>E-II</i>       | 150   | 300  | 251  | 1470       | 0.0267 | 3.49  | 3.09    | 12.5  | 26.2        | <i>hooked</i>     | 1     |
|                                                             | <i>F-I</i>        | 150   | 300  | 251  | 1470       | 0.0267 | 3.49  | 3.09    | 12.5  | 28.1        | <i>hooked</i>     | 1.5   |
|                                                             | <i>F-II</i>       | 150   | 300  | 251  | 1470       | 0.0267 | 3.49  | 3.09    | 12.5  | 27.3        | <i>hooked</i>     | 1.5   |
|                                                             | <i>G-I</i>        | 150   | 300  | 251  | 1470       | 0.0267 | 3.49  | 3.09    | 12.5  | 27.5        | <i>hooked</i>     | 0.5   |
|                                                             | <i>G-II</i>       | 150   | 300  | 251  | 1470       | 0.0267 | 3.49  | 3.09    | 12.5  | 24.9        | <i>hooked</i>     | 0.5   |
|                                                             | <i>H-I</i>        | 150   | 300  | 251  | 1470       | 0.0267 | 3.49  | 3.09    | 12.5  | 27.8        | <i>hooked</i>     | 0.75  |
|                                                             | <i>H-II</i>       | 150   | 300  | 251  | 1470       | 0.0267 | 3.49  | 3.09    | 12.5  | 27.3        | <i>hooked</i>     | 0.75  |
|                                                             | <i>I-I</i>        | 150   | 300  | 251  | 1470       | 0.0267 | 3.49  | 3.09    | 12.5  | 26.3        | <i>hooked</i>     | 1     |
|                                                             | <i>I-II</i>       | 150   | 300  | 251  | 1470       | 0.0267 | 3.49  | 3.09    | 12.5  | 27.1        | <i>hooked</i>     | 1     |
|                                                             | <i>K-I</i>        | 150   | 300  | 251  | 1470       | 0.0267 | 3.49  | 3.09    | 12.5  | 53.4        | <i>hooked</i>     | 0.75  |
|                                                             | <i>K-II</i>       | 150   | 300  | 251  | 1470       | 0.0267 | 3.49  | 3.09    | 12.5  | 54.1        | <i>hooked</i>     | 0.75  |
|                                                             | <i>L-I</i>        | 150   | 300  | 251  | 1470       | 0.0267 | 3.49  | 3.09    | 12.5  | 53.2        | <i>hooked</i>     | 1     |
|                                                             | <i>L-II</i>       | 150   | 300  | 251  | 1470       | 0.0267 | 3.49  | 3.09    | 12.5  | 55.3        | <i>hooked</i>     | 1     |
|                                                             | <i>P-I</i>        | 150   | 300  | 251  | 1470       | 0.0267 | 3.49  | 3.09    | 12.5  | 64.6        | <i>hooked</i>     | 1.5   |
|                                                             | <i>P-II</i>       | 150   | 300  | 251  | 1470       | 0.0267 | 3.49  | 3.09    | 12.5  | 59.9        | <i>hooked</i>     | 1.5   |
|                                                             | <i>AA-I</i>       | 150   | 300  | 251  | 1470       | 0.0267 | 3.49  | 3.09    | 12.5  | 47.8        | <i>hooked</i>     | 0.5   |
|                                                             | <i>AA-II</i>      | 150   | 300  | 251  | 1470       | 0.0267 | 3.49  | 3.09    | 12.5  | 49.5        | <i>hooked</i>     | 0.5   |
|                                                             | <i>M-I</i>        | 150   | 300  | 251  | 1470       | 0.0267 | 3.49  | 3.09    | 12.5  | 55.3        | <i>hooked</i>     | 0.75  |
|                                                             | <i>M-II</i>       | 150   | 300  | 251  | 1470       | 0.0267 | 3.49  | 3.09    | 12.5  | 56.4        | <i>hooked</i>     | 0.75  |
|                                                             | <i>N-I</i>        | 150   | 300  | 251  | 1470       | 0.0267 | 3.49  | 3.09    | 12.5  | 53.4        | <i>hooked</i>     | 1     |
|                                                             | <i>N-II</i>       | 150   | 300  | 251  | 1470       | 0.0267 | 3.49  | 3.09    | 12.5  | 51          | <i>hooked</i>     | 1     |
|                                                             | <i>R-I</i>        | 150   | 300  | 251  | 1470       | 0.0267 | 3.49  | 3.09    | 12.5  | 27.8        | <i>crimped</i>    | 1     |
|                                                             | <i>R-II</i>       | 150   | 300  | 251  | 1470       | 0.0267 | 3.49  | 3.09    | 12.5  | 27.2        | <i>crimped</i>    | 1     |
|                                                             | <i>U-I</i>        | 150   | 300  | 251  | 1470       | 0.0267 | 3.49  | 3.09    | 12.5  | 27.6        | <i>crimped</i>    | 1     |
|                                                             | <i>U-II</i>       | 150   | 300  | 251  | 1470       | 0.0267 | 3.49  | 3.09    | 12.5  | 27.9        | <i>crimped</i>    | 1     |
|                                                             | <i>W-I</i>        | 150   | 300  | 251  | 1470       | 0.0267 | 3.49  | 3.09    | 12.5  | 34.7        | <i>crimped</i>    | 1     |
|                                                             | <i>W-II</i>       | 150   | 300  | 251  | 1470       | 0.0267 | 3.49  | 3.09    | 12.5  | 36.2        | <i>crimped</i>    | 1     |
|                                                             | <i>Z-I</i>        | 150   | 300  | 251  | 1470       | 0.0267 | 3.49  | 3.09    | 12.5  | 37          | <i>crimped</i>    | 1     |
|                                                             | <i>Z-II</i>       | 150   | 300  | 251  | 1470       | 0.0267 | 3.49  | 3.09    | 12.5  | 38.3        | <i>crimped</i>    | 1     |
| <b><i>Sahoo &amp; Sharma<br/>2014</i></b>                   | <i>M-25-0.50</i>  | 150   | 300  | 261  | 1800       | 0.0116 | 2.30  | 1.92    | 20.0  | 28.7        | <i>hooked</i>     | 0.5   |
|                                                             | <i>M20-S-0.75</i> | 150   | 300  | 261  | 1800       | 0.0195 | 3.45  | 3.07    | 20.0  | 32.9        | <i>hooked</i>     | 0.75  |
|                                                             | <i>M20-S-1</i>    | 150   | 300  | 261  | 1800       | 0.0195 | 3.45  | 3.07    | 20.0  | 23.8        | <i>hooked</i>     | 1     |
|                                                             | <i>M20-S-1.25</i> | 150   | 300  | 261  | 1800       | 0.0195 | 3.45  | 3.07    | 20.0  | 24.1        | <i>hooked</i>     | 1.25  |
| <b><i>Shoaib, Lubell<br/>and Bindiganavile<br/>2015</i></b> | <i>L31</i>        | 310   | 308  | 258  | 1548       | 0.0184 | 3.00  | 2.42    | 10.0  | 22          | <i>hooked</i>     | 1     |
|                                                             | <i>L32</i>        | 310   | 308  | 258  | 1548       | 0.0245 | 3.00  | 2.42    | 10.0  | 31          | <i>hooked</i>     | 1     |
|                                                             | <i>L62</i>        | 300   | 600  | 550  | 3300       | 0.0119 | 3.00  | 2.73    | 10.0  | 30          | <i>hooked</i>     | 1     |
| <b><i>Manju et al<br/>2017</i></b>                          | <i>SH1</i>        | 140   | 220  | 175  | 2000       | 0.0128 | 1.50  | 0.93    | 12.0  | 82          | <i>hooked</i>     | 0.5   |
|                                                             | <i>SH2</i>        | 140   | 220  | 175  | 2000       | 0.0128 | 1.50  | 0.93    | 12.0  | 83.2        | <i>hooked</i>     | 1     |
|                                                             | <i>SH3</i>        | 140   | 220  | 175  | 2000       | 0.0128 | 1.50  | 0.93    | 12.0  | 83.8        | <i>hooked</i>     | 1.5   |

|                                          |                 |     |       |     |         |        |      |      |      |       |        |      |
|------------------------------------------|-----------------|-----|-------|-----|---------|--------|------|------|------|-------|--------|------|
|                                          | SH4             | 140 | 220   | 175 | 2000    | 0.0128 | 2.50 | 1.93 | 12.0 | 82    | hooked | 0.5  |
|                                          | SH5             | 140 | 220   | 175 | 2000    | 0.0128 | 2.50 | 1.93 | 12.0 | 83.2  | hooked | 1    |
|                                          | SH6             | 140 | 220   | 175 | 2000    | 0.0128 | 2.50 | 1.93 | 12.0 | 83.8  | hooked | 1.5  |
| <b>Arslan et al.<br/>2017</b>            | A2.5F1.0A       | 150 | 230   | 200 | 1000    | 0.0134 | 2.50 | 2.00 | 22.0 | 33.68 | hooked | 1    |
|                                          | A2.5F1.0b       | 150 | 230   | 200 | 1000    | 0.0134 | 2.50 | 2.00 | 22.0 | 24.53 | hooked | 1    |
|                                          | A2.5F2.0        | 150 | 230   | 200 | 1000    | 0.0134 | 2.50 | 2.00 | 22.0 | 21.43 | hooked | 2    |
|                                          | A2.5F3.0        | 150 | 230   | 200 | 1000    | 0.0134 | 2.50 | 2.00 | 12.0 | 9.77  | hooked | 3    |
|                                          | A3.5F1.0        | 150 | 230   | 200 | 1400    | 0.0134 | 3.50 | 3.00 | 22.0 | 20.21 | hooked | 1    |
|                                          | A3.5F2.0        | 150 | 230   | 200 | 1400    | 0.0134 | 3.50 | 3.00 | 22.0 | 21.43 | hooked | 2    |
|                                          | A3.5F3.0        | 150 | 230   | 200 | 1400    | 0.0134 | 3.50 | 3.00 | 12.0 | 27.91 | hooked | 3    |
|                                          | A4.5F1.0        | 150 | 230   | 200 | 1800    | 0.0134 | 4.50 | 4.00 | 22.0 | 24.53 | hooked | 1    |
|                                          | A4.5F2.0        | 150 | 230   | 200 | 1800    | 0.0134 | 4.50 | 4.00 | 22.0 | 21.43 | hooked | 2    |
| <b>Parra-Montesinos<br/>et al. 2006</b>  | 11              | 152 | 457.2 | 381 | 2766.2  | 0.0271 | 3.40 | 3.41 | 10.0 | 49.2  | hooked | 1    |
|                                          | 7               | 152 | 457.2 | 381 | 2766.2  | 0.0271 | 3.40 | 3.41 | 10.0 | 31    | hooked | 1.5  |
|                                          | 10              | 152 | 457.2 | 381 | 2766.2  | 0.0271 | 3.40 | 3.41 | 10.0 | 44.9  | hooked | 1.5  |
|                                          | 9               | 152 | 457.2 | 381 | 2766.2  | 0.0271 | 3.40 | 3.41 | 10.0 | 44.9  | hooked | 1.5  |
|                                          | 12              | 152 | 457.2 | 381 | 2766.2  | 0.0271 | 3.40 | 3.41 | 10.0 | 49.2  | hooked | 1    |
|                                          | 8               | 152 | 457.2 | 381 | 2766.2  | 0.0271 | 3.40 | 3.41 | 10.0 | 31    | hooked | 1.5  |
|                                          | 4               | 152 | 457.2 | 381 | 2817    | 0.0271 | 3.50 | 3.47 | 10.0 | 38.1  | hooked | 1    |
|                                          | 3               | 152 | 457.2 | 381 | 2817    | 0.0271 | 3.50 | 3.47 | 10.0 | 38.1  | hooked | 1    |
|                                          | 1               | 152 | 457.2 | 381 | 2817    | 0.0197 | 3.50 | 3.47 | 10.0 | 38.1  | hooked | 1    |
| <b>Rosenbusch &amp;<br/>Teutsch 2003</b> | 2               | 152 | 457.2 | 381 | 2817    | 0.0197 | 3.50 | 3.47 | 10.0 | 38.1  | hooked | 1    |
|                                          | 2.2/2           | 200 | 300   | 260 | 952.64  | 0.0181 | 1.50 | 1.51 | 10.0 | 41.2  | hooked | 0.25 |
|                                          | 2.2/3           | 200 | 300   | 260 | 952.64  | 0.0181 | 1.50 | 1.51 | 10.0 | 40.3  | hooked | 0.76 |
|                                          | 2.4/2           | 200 | 300   | 260 | 1450.48 | 0.0181 | 2.50 | 2.46 | 10.0 | 40    | hooked | 0.25 |
|                                          | 2.4/3           | 200 | 300   | 260 | 1450.48 | 0.0181 | 2.50 | 2.46 | 10.0 | 38.7  | hooked | 0.76 |
|                                          | 2.3/2           | 200 | 300   | 260 | 1450.48 | 0.0115 | 2.50 | 2.46 | 10.0 | 40    | hooked | 0.25 |
|                                          | 2.3/3           | 200 | 300   | 260 | 1450.48 | 0.0115 | 2.50 | 2.46 | 10.0 | 38.7  | hooked | 0.76 |
|                                          | T15*100-SFRC -2 | 200 | 500   | 460 | 3248.8  | 0.0280 | 3.40 | 3.35 | 10.0 | 37.7  | hooked | 0.5  |
|                                          | T23*50-SFRC -2  | 200 | 500   | 460 | 3248.8  | 0.0280 | 3.40 | 3.35 | 10.0 | 38.8  | hooked | 0.5  |
|                                          | T15*75-SFRC -2  | 200 | 500   | 460 | 3248.8  | 0.0280 | 3.40 | 3.35 | 10.0 | 37.7  | hooked | 0.5  |
|                                          | T15*50-SFRC -1  | 200 | 500   | 460 | 3248.8  | 0.0280 | 3.40 | 3.35 | 10.0 | 37.7  | hooked | 0.5  |
|                                          | 1.2/2           | 200 | 300   | 260 | 1948.32 | 0.0356 | 3.50 | 3.42 | 10.0 | 46.9  | hooked | 0.25 |
|                                          | 1.2/3           | 200 | 300   | 260 | 1948.32 | 0.0356 | 3.50 | 3.42 | 10.0 | 43.7  | hooked | 0.51 |
|                                          | 1.2/4           | 200 | 300   | 260 | 1948.32 | 0.0356 | 3.50 | 3.42 | 10.0 | 48.3  | hooked | 0.76 |
|                                          | 20*30-SFRC -1   | 200 | 300   | 260 | 1968.64 | 0.0283 | 3.50 | 3.46 | 10.0 | 37.7  | hooked | 0.5  |
|                                          | 20*30-SFRC -2   | 200 | 300   | 260 | 1968.64 | 0.0283 | 3.50 | 3.46 | 10.0 | 38.8  | hooked | 0.5  |
|                                          | 20*60-SFRC -1   | 200 | 600   | 540 | 3929.52 | 0.0273 | 3.50 | 3.48 | 10.0 | 37.7  | hooked | 0.25 |
|                                          | 20*60-SFRC -2   | 200 | 600   | 560 | 3929.52 | 0.0273 | 3.50 | 3.36 | 10.0 | 38.8  | hooked | 0.5  |
|                                          | 2.6/2           | 200 | 300   | 260 | 2253.12 | 0.0181 | 4.00 | 4.01 | 10.0 | 41.2  | hooked | 0.25 |
|                                          | 2.6/3           | 200 | 300   | 260 | 2253.12 | 0.0181 | 4.00 | 4.01 | 10.0 | 40.3  | hooked | 0.76 |
| <b>Sahoo et al.<br/>2016</b>             | TB0.75_1.6      | 150 | 250   | 217 | 1150    | 0.0185 | 1.59 | 1.13 | 10.0 | 35    | hooked | 0.75 |
|                                          | TB0.75_2.5      | 150 | 250   | 217 | 1600    | 0.0185 | 2.47 | 2.00 | 10.0 | 35    | hooked | 0.75 |
|                                          | TB0.75_3.0      | 150 | 250   | 217 | 1750    | 0.0185 | 2.95 | 2.49 | 10.0 | 35    | hooked | 0.75 |

|                                                               |                  |     |     |     |      |        |      |      |      |        |                |       |
|---------------------------------------------------------------|------------------|-----|-----|-----|------|--------|------|------|------|--------|----------------|-------|
| <b>Amin &amp; Foster<br/>2016<br/>Tahenni et al.<br/>2016</b> | <i>B25-0-0-</i>  | 300 | 700 | 622 | 4500 | 0.0198 | 2.81 | 2.49 | 10.0 | 34     | <i>hooked</i>  | 0.321 |
|                                                               | <i>B50-0-0</i>   | 300 | 700 | 622 | 4500 | 0.0198 | 2.81 | 2.49 | 10   | 36     | <i>hooked</i>  | 0.687 |
|                                                               | <i>SOF0.5-65</i> | 100 | 150 | 135 | 900  | 0.0116 | 2.22 | 2.15 | 15.0 | 64.2   | <i>hooked</i>  | 0.5   |
|                                                               | <i>SOF0.5-65</i> | 100 | 150 | 135 | 900  | 0.0116 | 2.22 | 2.15 | 15.0 | 64.2   | <i>hooked</i>  | 0.5   |
|                                                               | <i>SOF0.5-65</i> | 100 | 150 | 135 | 900  | 0.0116 | 2.22 | 2.15 | 15.0 | 64.2   | <i>hooked</i>  | 0.5   |
|                                                               | <i>SOF1.0-65</i> | 100 | 150 | 135 | 900  | 0.0116 | 2.22 | 2.15 | 15.0 | 64     | <i>hooked</i>  | 1     |
|                                                               | <i>SOF1.0-65</i> | 100 | 150 | 135 | 900  | 0.0116 | 2.22 | 2.15 | 15.0 | 64     | <i>hooked</i>  | 1     |
|                                                               | <i>SOF1.0-65</i> | 100 | 150 | 135 | 900  | 0.0116 | 2.22 | 2.15 | 15.0 | 64     | <i>hooked</i>  | 1     |
|                                                               | <i>SOF1.0-80</i> | 100 | 150 | 135 | 900  | 0.0116 | 2.22 | 2.15 | 15.0 | 60     | <i>hooked</i>  | 1     |
|                                                               | <i>SOF1.0-80</i> | 100 | 150 | 135 | 900  | 0.0116 | 2.22 | 2.15 | 15.0 | 60     | <i>hooked</i>  | 1     |
|                                                               | <i>SOF1.0-80</i> | 100 | 150 | 135 | 900  | 0.0116 | 2.22 | 2.15 | 15.0 | 60     | <i>hooked</i>  | 1     |
| <b>Narayanan &amp;<br/>Darwish<br/>1987</b>                   | <i>SF1</i>       | 85  | 150 | 130 | 900  | 0.0205 | 2.02 | 1.94 | 9.6  | 51.85  | <i>crimped</i> | 0.25  |
|                                                               | <i>SF2</i>       | 85  | 150 | 130 | 1030 | 0.0205 | 2.52 | 2.44 | 9.6  | 51.85  | <i>crimped</i> | 0.25  |
|                                                               | <i>SF3</i>       | 85  | 150 | 130 | 1160 | 0.0205 | 3.02 | 2.94 | 9.6  | 51.85  | <i>crimped</i> | 0.25  |
|                                                               | <i>SF4</i>       | 85  | 150 | 130 | 900  | 0.0205 | 2.02 | 1.94 | 9.6  | 33.32  | <i>crimped</i> | 0.25  |
|                                                               | <i>SF5</i>       | 85  | 150 | 130 | 1030 | 0.0205 | 2.52 | 2.44 | 9.6  | 33.32  | <i>crimped</i> | 0.25  |
|                                                               | <i>SF6</i>       | 85  | 150 | 130 | 1160 | 0.0205 | 3.02 | 2.94 | 9.6  | 33.32  | <i>crimped</i> | 0.25  |
|                                                               | <i>B1</i>        | 85  | 150 | 130 | 1160 | 0.0205 | 3.02 | 2.94 | 9.6  | 51.68  | <i>crimped</i> | 0.5   |
|                                                               | <i>B7</i>        | 85  | 150 | 130 | 1160 | 0.0205 | 3.02 | 2.94 | 9.6  | 30.6   | <i>crimped</i> | 0.5   |
|                                                               | <i>B9</i>        | 85  | 150 | 130 | 1160 | 0.0205 | 3.02 | 2.94 | 9.6  | 31.025 | <i>crimped</i> | 1     |
|                                                               | <i>B11</i>       | 85  | 150 | 130 | 900  | 0.0205 | 2.02 | 1.94 | 9.6  | 51.68  | <i>crimped</i> | 0.5   |
|                                                               | <i>B12</i>       | 85  | 150 | 130 | 1030 | 0.0205 | 2.52 | 2.44 | 9.6  | 51.68  | <i>crimped</i> | 0.5   |
|                                                               | <i>B13</i>       | 85  | 150 | 130 | 1290 | 0.0205 | 3.52 | 3.44 | 9.6  | 41.65  | <i>crimped</i> | 0.5   |
|                                                               | <i>B14</i>       | 85  | 150 | 130 | 900  | 0.0205 | 2.02 | 1.94 | 9.6  | 48.705 | <i>crimped</i> | 1     |
|                                                               | <i>B15</i>       | 85  | 150 | 130 | 1030 | 0.0205 | 2.52 | 2.44 | 9.6  | 48.705 | <i>crimped</i> | 1     |
|                                                               | <i>B16</i>       | 85  | 150 | 130 | 1290 | 0.0205 | 3.52 | 3.44 | 9.6  | 48.79  | <i>crimped</i> | 1     |
|                                                               | <i>B17</i>       | 85  | 150 | 128 | 1160 | 0.0370 | 3.06 | 2.98 | 9.6  | 41.65  | <i>crimped</i> | 0.5   |
|                                                               | <i>B18</i>       | 85  | 150 | 126 | 1160 | 0.0572 | 3.11 | 3.03 | 9.6  | 41.65  | <i>crimped</i> | 0.5   |
|                                                               | <i>B19</i>       | 85  | 150 | 128 | 1160 | 0.0370 | 3.06 | 2.98 | 9.6  | 30.6   | <i>crimped</i> | 0.5   |
|                                                               | <i>B20</i>       | 85  | 150 | 126 | 1160 | 0.0572 | 3.11 | 3.03 | 9.6  | 30.6   | <i>crimped</i> | 0.5   |
|                                                               | <i>B23</i>       | 85  | 150 | 128 | 1160 | 0.0370 | 3.06 | 2.98 | 9.6  | 48.79  | <i>crimped</i> | 1     |
|                                                               | <i>B24</i>       | 85  | 150 | 126 | 1160 | 0.0572 | 3.11 | 3.03 | 9.6  | 48.79  | <i>crimped</i> | 1     |
|                                                               | <i>B25</i>       | 85  | 150 | 126 | 1160 | 0.0572 | 3.11 | 3.03 | 9.6  | 53.55  | <i>crimped</i> | 1.5   |
|                                                               | <i>B26</i>       | 85  | 150 | 126 | 1160 | 0.0572 | 3.11 | 3.03 | 9.6  | 43.18  | <i>crimped</i> | 2     |
|                                                               | <i>B27</i>       | 85  | 150 | 128 | 1160 | 0.0370 | 3.06 | 2.98 | 9.6  | 53.55  | <i>crimped</i> | 1.5   |
|                                                               | <i>B28</i>       | 85  | 150 | 126 | 900  | 0.0572 | 2.08 | 2.00 | 9.6  | 50.15  | <i>crimped</i> | 0.5   |
|                                                               | <i>B29</i>       | 85  | 150 | 126 | 900  | 0.0572 | 2.08 | 2.00 | 9.6  | 45.9   | <i>crimped</i> | 1     |
|                                                               | <i>B30</i>       | 85  | 150 | 126 | 900  | 0.0572 | 2.08 | 2.00 | 9.6  | 53.55  | <i>crimped</i> | 1.5   |
|                                                               | <i>B31</i>       | 85  | 150 | 126 | 900  | 0.0572 | 2.08 | 2.00 | 9.6  | 43.18  | <i>crimped</i> | 2     |
| <b>Cucchiara et al.<br/>2004</b>                              | <i>A10</i>       | 150 | 250 | 219 | 2300 | 0.0191 | 2.80 | 2.75 | 10.0 | 40.85  | <i>hooked</i>  | 1     |
|                                                               | <i>A20</i>       | 150 | 250 | 219 | 2300 | 0.0191 | 2.80 | 2.75 | 10.0 | 40.85  | <i>hooked</i>  | 2     |
|                                                               | <i>B10</i>       | 150 | 250 | 219 | 2300 | 0.0191 | 2.00 | 1.95 | 10.0 | 43.23  | <i>hooked</i>  | 1     |
|                                                               | <i>B20</i>       | 150 | 250 | 219 | 2300 | 0.0191 | 2.00 | 1.95 | 10.0 | 43.23  | <i>hooked</i>  | 2     |

|                                               |                       |     |      |     |      |        |      |      |      |       |                              |      |
|-----------------------------------------------|-----------------------|-----|------|-----|------|--------|------|------|------|-------|------------------------------|------|
| <b><i>Kwak et al.<br/>2002</i></b>            | <i>FHB2-2</i>         | 125 | 250  | 212 | 1248 | 0.0152 | 2.00 | 1.46 | 19.0 | 63.8  | <i>hooked</i>                | 0.5  |
|                                               | <i>FHB3-2</i>         | 125 | 250  | 212 | 1248 | 0.0152 | 2.00 | 1.46 | 19.0 | 68.6  | <i>hooked</i>                | 0.75 |
|                                               | <i>FNB2-2</i>         | 125 | 250  | 212 | 1248 | 0.0152 | 2.00 | 1.46 | 19.0 | 30.8  | <i>hooked</i>                | 0.5  |
|                                               | <i>FNB2-3</i>         | 125 | 250  | 212 | 1672 | 0.0152 | 3.00 | 2.46 | 19.0 | 30.8  | <i>hooked</i>                | 0.5  |
| <b><i>Lim &amp; Oh<br/>1999</i></b>           | <i>S0.00V1</i>        | 100 | 180  | 130 | 1300 | 0.0309 | 3.08 | 3.00 | 10.0 | 38.69 | <i>straight smooth</i>       | 1    |
|                                               | <i>S0.00V2</i>        | 100 | 180  | 130 | 1300 | 0.0309 | 3.08 | 3.00 | 10.0 | 42.4  | <i>straight smooth</i>       | 2    |
|                                               | <i>B18-1a</i>         | 152 | 455  | 381 | 2136 | 0.0196 | 3.44 | 3.04 | 10.0 | 44.8  | <i>hooked</i>                | 0.75 |
|                                               | <i>B18-1b</i>         | 152 | 455  | 381 | 2136 | 0.0196 | 3.44 | 3.04 | 10.0 | 44.8  | <i>hooked</i>                | 0.75 |
|                                               | <i>B18-2a</i>         | 152 | 455  | 381 | 2136 | 0.0196 | 3.44 | 3.04 | 10.0 | 38.1  | <i>hooked</i>                | 1    |
|                                               | <i>B18-2b</i>         | 152 | 455  | 381 | 2136 | 0.0196 | 3.44 | 3.04 | 10.0 | 38.1  | <i>hooked</i>                | 1    |
|                                               | <i>B18-3a</i>         | 152 | 455  | 381 | 2136 | 0.0263 | 3.44 | 3.04 | 10.0 | 31    | <i>hooked</i>                | 1.5  |
|                                               | <i>B18-3b</i>         | 152 | 455  | 381 | 2136 | 0.0263 | 3.44 | 3.04 | 10.0 | 31    | <i>hooked</i>                | 1.5  |
|                                               | <i>B18-3c</i>         | 152 | 455  | 381 | 2136 | 0.0263 | 3.44 | 3.04 | 10.0 | 44.9  | <i>hooked</i>                | 1.5  |
|                                               | <i>B18-3d</i>         | 152 | 455  | 381 | 2136 | 0.0263 | 3.44 | 3.04 | 10.0 | 44.9  | <i>hooked</i>                | 1.5  |
|                                               | <i>B18-5a</i>         | 152 | 455  | 381 | 2136 | 0.0263 | 3.44 | 3.04 | 10.0 | 49.2  | <i>hooked</i>                | 1    |
|                                               | <i>B18-5b</i>         | 152 | 455  | 381 | 2136 | 0.0263 | 3.44 | 3.04 | 10.0 | 49.2  | <i>hooked</i>                | 1    |
|                                               | <i>B18-7a</i>         | 152 | 455  | 381 | 2136 | 0.0196 | 3.44 | 3.04 | 10.0 | 43.3  | <i>hooked</i>                | 0.75 |
|                                               | <i>B18-7b</i>         | 152 | 455  | 381 | 2136 | 0.0196 | 3.44 | 3.04 | 10.0 | 43.3  | <i>hooked</i>                | 0.75 |
|                                               | <i>B27-1a</i>         | 205 | 685  | 610 | 3558 | 0.0196 | 3.50 | 3.21 | 10.0 | 50.8  | <i>hooked</i>                | 0.75 |
|                                               | <i>B27-1b</i>         | 205 | 685  | 610 | 3558 | 0.0196 | 3.50 | 3.21 | 10.0 | 50.8  | <i>hooked</i>                | 0.75 |
| <b><i>Dinh et al.<br/>2010</i></b>            | <i>B27-2a</i>         | 205 | 685  | 610 | 3558 | 0.0196 | 3.50 | 3.21 | 10.0 | 28.7  | <i>hooked</i>                | 0.75 |
|                                               | <i>B27-2b</i>         | 205 | 685  | 610 | 3558 | 0.0196 | 3.50 | 3.21 | 10.0 | 28.7  | <i>hooked</i>                | 0.75 |
|                                               | <i>B27-3b</i>         | 205 | 685  | 610 | 3558 | 0.0152 | 3.50 | 3.21 | 10.0 | 42.3  | <i>hooked</i>                | 0.75 |
|                                               | <i>B27-4a</i>         | 205 | 685  | 610 | 3558 | 0.0152 | 3.50 | 3.21 | 10.0 | 29.6  | <i>hooked</i>                | 0.75 |
|                                               | <i>B27-4b</i>         | 205 | 685  | 610 | 3558 | 0.0152 | 3.50 | 3.21 | 10.0 | 29.6  | <i>hooked</i>                | 0.75 |
|                                               | <i>B27-5</i>          | 205 | 685  | 610 | 3558 | 0.0196 | 3.50 | 3.21 | 10.0 | 44.4  | <i>hooked</i>                | 1.5  |
| <b><i>Lima Araujo<br/>et al. 2014</i></b>     | <i>V-1-0</i>          | 150 | 390  | 340 | 2200 | 0.0308 | 2.50 | 2.21 | 12.5 | 58.87 | <i>hooked</i>                | 1    |
|                                               | <i>V-2-0</i>          | 150 | 390  | 340 | 2200 | 0.0308 | 2.50 | 2.21 | 12.5 | 51.67 | <i>hooked</i>                | 2    |
| <b><i>Casanova et<br/>al. 1997</i></b>        | <i>FRC1</i>           | 150 | 800  | 735 | 5600 | 0.0106 | 3.81 | 3.67 | 12.5 | 42    | <i>hooked</i>                | 1.25 |
|                                               | <i>FRC2</i>           | 150 | 800  | 735 | 5600 | 0.0106 | 3.81 | 3.67 | 12.5 | 38    | <i>hooked</i>                | 1.25 |
|                                               | <i>HSPRC 1</i>        | 125 | 250  | 225 | 2000 | 0.0349 | 2.89 | 2.44 | 10.0 | 90    | <i>hooked</i>                | 1.25 |
| <b><i>Aoude et al.<br/>2012</i></b>           | <i>A0.5%</i>          | 150 | 250  | 202 | 1700 | 0.0117 | 2.97 | 2.48 | 10.0 | 21.3  | <i>hooked</i>                | 0.5  |
|                                               | <i>A1%</i>            | 150 | 250  | 202 | 1700 | 0.0117 | 2.97 | 2.48 | 10.0 | 19.6  | <i>hooked</i>                | 1    |
|                                               | <i>B0.5%</i>          | 300 | 500  | 437 | 3700 | 0.015  | 3.09 | 2.86 | 10.0 | 21.3  | <i>hooked</i>                | 0.5  |
|                                               | <i>B1%</i>            | 300 | 500  | 437 | 3700 | 0.015  | 3.09 | 2.86 | 10   | 19.6  | <i>hooked</i>                | 1    |
| <b><i>Minelli &amp;<br/>Plizzari 2013</i></b> | <i>NSC1-FRC1</i>      | 200 | 480  | 435 | 4350 | 0.0104 | 2.51 | 2.30 | 20   | 24.8  | <i>hooked</i>                | 0.38 |
|                                               | <i>NSC2-FRC1</i>      | 200 | 480  | 435 | 4350 | 0.0104 | 2.51 | 2.30 | 20   | 33.5  | <i>hooked</i>                | 0.38 |
|                                               | <i>NSC2-FRC2</i>      | 200 | 480  | 435 | 4350 | 0.0104 | 2.51 | 2.30 | 20   | 33.5  | <i>hooked +<br/>straight</i> | 0.57 |
|                                               | <i>NSC3-FRC</i>       | 200 | 480  | 435 | 4350 | 0.0104 | 2.51 | 2.30 | 20   | 38.6  | <i>hooked</i>                | 0.38 |
|                                               | <i>HSC1-FRC1</i>      | 200 | 480  | 435 | 4350 | 0.0104 | 2.51 | 2.30 | 20   | 61.1  | <i>hooked</i>                | 0.64 |
|                                               | <i>NSC4-FRC-500-1</i> | 200 | 500  | 455 | 2280 | 0.0099 | 2.51 | 2.31 | 15   | 24.4  | <i>hooked</i>                | 0.25 |
|                                               | <i>NSC4-FRC-500-2</i> | 200 | 500  | 455 | 2280 | 0.0099 | 2.51 | 2.31 | 15   | 24.4  | <i>hooked</i>                | 0.25 |
|                                               | <i>NSC4-FRC-1000</i>  | 200 | 1000 | 910 | 4550 | 0.0104 | 2.50 | 2.40 | 20   | 24.4  | <i>hooked</i>                | 0.25 |
|                                               | <i>HSC2-FRC-1000</i>  | 200 | 1000 | 910 | 4550 | 0.0104 | 2.50 | 2.40 | 20   | 55    | <i>hooked</i>                | 0.25 |

|                                       |                            |     |      |      |        |        |      |      |    |      |                          |      |
|---------------------------------------|----------------------------|-----|------|------|--------|--------|------|------|----|------|--------------------------|------|
| <b>Kang et al.<br/>2011</b>           | <i>FLB-0.5-2</i>           | 125 | 250  | 210  | 1250   | 0.0153 | 2.00 | 1.52 | 19 | 44.6 | <i>hooked</i>            | 0.5  |
|                                       | <i>FLB-0.5-4</i>           | 125 | 250  | 210  | 2100   | 0.0153 | 4.00 | 3.52 | 19 | 44.6 | <i>hooked</i>            | 0.5  |
|                                       | <i>FNB-0.5-2</i>           | 125 | 250  | 210  | 1250   | 0.0153 | 2.00 | 1.52 | 19 | 57.2 | <i>hooked</i>            | 0.5  |
| <b>Casanova &amp;<br/>Rossi 1999</b>  | <i>HSFRC 1</i>             | 125 | 250  | 225  | 2000   | 0.0349 | 2.89 | 2.44 | 10 | 90   | <i>hooked</i>            | 1.25 |
|                                       | <i>HSFRC 2</i>             | 125 | 250  | 225  | 2000   | 0.0349 | 2.89 | 2.44 | 10 | 90   | <i>hooked</i>            | 1.25 |
| <b>Lim et al.<br/>1987</b>            | <i>2/0.5/2.5</i>           | 152 | 254  | 221  | 2100   | 0.0120 | 2.50 | 2.45 | 10 | 34   | <i>hooked</i>            | 0.5  |
|                                       | <i>4/1.0/1.5</i>           | 152 | 254  | 221  | 1600   | 0.0239 | 1.50 | 1.45 | 10 | 34   | <i>hooked</i>            | 1    |
|                                       | <i>4/1.0/2.5</i>           | 152 | 254  | 221  | 2100   | 0.0239 | 2.50 | 2.45 | 10 | 34   | <i>hooked</i>            | 1    |
|                                       | <i>4/1.0/3.5</i>           | 152 | 254  | 221  | 2100   | 0.0239 | 3.50 | 3.45 | 10 | 34   | <i>hooked</i>            | 1    |
|                                       | <i>4/0.5/1.5</i>           | 152 | 254  | 221  | 1600   | 0.0239 | 1.50 | 1.45 | 10 | 34   | <i>hooked</i>            | 0.5  |
|                                       | <i>4/0.5/2.5</i>           | 152 | 254  | 221  | 2100   | 0.0239 | 2.50 | 2.45 | 10 | 34   | <i>hooked</i>            | 0.5  |
|                                       | <i>4/0.5/3.5</i>           | 152 | 254  | 221  | 2100   | 0.0239 | 3.50 | 3.45 | 10 | 34   | <i>hooked</i>            | 0.5  |
| <b>Mansur et al.<br/>1986</b>         | <i>B1</i>                  | 150 | 225  | 197  | 1288   | 0.0136 | 2.00 | 1.49 | 20 | 29.1 | <i>hooked</i>            | 0.5  |
|                                       | <i>B2</i>                  | 150 | 225  | 197  | 1603.2 | 0.0136 | 2.80 | 2.29 | 20 | 29.1 | <i>hooked</i>            | 0.5  |
|                                       | <i>B3</i>                  | 150 | 225  | 197  | 1918.4 | 0.0136 | 3.60 | 3.09 | 20 | 29.1 | <i>hooked</i>            | 0.5  |
|                                       | <i>C1</i>                  | 150 | 225  | 197  | 1288   | 0.0136 | 2.00 | 1.49 | 20 | 29.9 | <i>hooked</i>            | 0.75 |
|                                       | <i>C2</i>                  | 150 | 225  | 197  | 1603.2 | 0.0136 | 2.80 | 2.29 | 20 | 29.9 | <i>hooked</i>            | 0.75 |
|                                       | <i>C6</i>                  | 150 | 225  | 197  | 1603.2 | 0.0204 | 2.80 | 2.29 | 20 | 29.9 | <i>hooked</i>            | 0.75 |
|                                       | <i>E2</i>                  | 150 | 225  | 197  | 1603.2 | 0.0136 | 2.80 | 2.29 | 20 | 20.6 | <i>hooked</i>            | 0.75 |
|                                       | <i>E3</i>                  | 150 | 225  | 197  | 1603.2 | 0.0204 | 2.80 | 2.29 | 20 | 20.6 | <i>hooked</i>            | 0.75 |
|                                       | <i>F3</i>                  | 150 | 225  | 197  | 1603.2 | 0.0204 | 2.80 | 2.29 | 20 | 33.4 | <i>hooked</i>            | 0.75 |
| <b>Zarrinpour &amp;<br/>Chao 2017</b> | <i>SFRC 12W6</i>           | 152 | 305  | 254  | 1778   | 0.0248 | 3.50 | 2.90 | 10 | 29   | <i>hooked</i>            | 0.75 |
|                                       | <i>SFRC 12W24</i>          | 610 | 305  | 254  | 1778   | 0.0247 | 3.50 | 2.90 | 10 | 29   | <i>hooked</i>            | 0.75 |
|                                       | <i>SFRC 18a</i>            | 152 | 457  | 394  | 2844.8 | 0.0286 | 3.61 | 3.22 | 10 | 39   | <i>hooked</i>            | 0.75 |
|                                       | <i>SFRC 18b</i>            | 152 | 457  | 394  | 2844.8 | 0.0286 | 3.61 | 3.22 | 10 | 39   | <i>hooked</i>            | 0.75 |
|                                       | <i>SFRC 24a</i>            | 203 | 610  | 541  | 3733.8 | 0.0254 | 3.45 | 3.17 | 10 | 50   | <i>hooked</i>            | 0.75 |
|                                       | <i>SFRC 24b</i>            | 203 | 610  | 541  | 3733.8 | 0.0254 | 3.45 | 3.17 | 10 | 50   | <i>hooked</i>            | 0.75 |
|                                       | <i>SFRC 36a</i>            | 254 | 915  | 813  | 5689.6 | 0.0270 | 3.50 | 3.31 | 10 | 50   | <i>hooked</i>            | 0.75 |
|                                       | <i>SFRC 36b</i>            | 254 | 915  | 813  | 5689.6 | 0.0270 | 3.50 | 3.31 | 10 | 50   | <i>hooked</i>            | 0.75 |
|                                       | <i>SFRC 48a</i>            | 305 | 1220 | 1118 | 7823.2 | 0.0255 | 3.50 | 3.35 | 10 | 50   | <i>hooked</i>            | 0.75 |
|                                       | <i>SFRC 48b</i>            | 305 | 1220 | 1118 | 7823.2 | 0.0255 | 3.50 | 3.35 | 10 | 50   | <i>hooked</i>            | 0.75 |
| <b>Noghabai 2000</b>                  | <i>HSC.I.S6/0.15</i>       | 200 | 250  | 180  | 1200   | 0.0447 | 3.33 | 2.22 | 16 | 90.6 | <i>straight smooth</i>   | 1    |
|                                       | <i>HSC.I.Smix</i>          | 200 | 250  | 180  | 1200   | 0.0447 | 3.33 | 2.22 | 16 | 83.2 | <i>hooked + straight</i> | 1    |
|                                       | <i>HSC.I.S60/0.7/0.5</i>   | 200 | 250  | 180  | 1200   | 0.0447 | 3.33 | 2.22 | 16 | 80.5 | <i>hooked</i>            | 0.5  |
|                                       | <i>HSC.I.S60/0.7/0.75</i>  | 200 | 250  | 180  | 1200   | 0.0447 | 3.33 | 2.22 | 16 | 80.5 | <i>hooked</i>            | 0.75 |
|                                       | <i>NSC.II.Smix</i>         | 200 | 250  | 195  | 1200   | 0.0309 | 3.08 | 2.05 | 16 | 39.4 | <i>hooked + straight</i> | 1    |
|                                       | <i>HSC.II.S30/0.6</i>      | 200 | 300  | 235  | 1300   | 0.0428 | 2.77 | 1.91 | 16 | 91.4 | <i>hooked</i>            | 1    |
|                                       | <i>HSC.II.S6/0.15</i>      | 200 | 300  | 235  | 1300   | 0.0428 | 2.77 | 1.91 | 16 | 93.3 | <i>straight smooth</i>   | 1    |
|                                       | <i>HSC.II.Smix</i>         | 200 | 300  | 235  | 1300   | 0.0428 | 2.77 | 1.91 | 16 | 89.6 | <i>hooked + straight</i> | 1    |
|                                       | <i>HSC.III.S6/0.15</i>     | 200 | 500  | 410  | 3000   | 0.0306 | 2.93 | 2.44 | 18 | 76.8 | <i>straight smooth</i>   | 1    |
|                                       | <i>HSC.III.S6/0.15</i>     | 200 | 500  | 410  | 3000   | 0.0306 | 2.93 | 2.44 | 18 | 76.8 | <i>straight smooth</i>   | 1    |
|                                       | <i>HSC.III.Smix</i>        | 200 | 500  | 410  | 3000   | 0.0306 | 2.93 | 2.44 | 18 | 72   | <i>hooked + straight</i> | 1    |
|                                       | <i>HSC.III.Smix</i>        | 200 | 500  | 410  | 3000   | 0.0306 | 2.93 | 2.44 | 18 | 72   | <i>hooked + straight</i> | 1    |
|                                       | <i>HSC.III.S60/0.7/0.5</i> | 200 | 500  | 410  | 3000   | 0.0306 | 2.93 | 2.44 | 18 | 69.3 | <i>hooked</i>            | 0.5  |
|                                       | <i>HSC.III.S60/0.7/0.5</i> | 200 | 500  | 410  | 3000   | 0.0306 | 2.93 | 2.44 | 18 | 69.3 | <i>hooked</i>            | 0.5  |

|                                         |                          |     |     |     |      |        |      |      |     |          |                      |      |
|-----------------------------------------|--------------------------|-----|-----|-----|------|--------|------|------|-----|----------|----------------------|------|
|                                         | HSC.III.S60/0.7/0.7<br>5 | 200 | 500 | 410 | 3000 | 0.0306 | 2.93 | 2.44 | 18  | 60.2     | hooked               | 0.75 |
|                                         | HSC.IV.S60/0.7/0.7<br>5  | 200 | 500 | 410 | 3000 | 0.0306 | 2.93 | 2.44 | 18  | 75.7     | hooked               | 0.75 |
|                                         | HSC.III.S6/0.15          | 300 | 700 | 570 | 5000 | 0.0287 | 2.98 | 2.63 | 18  | 76.8     | straight<br>smooth   | 1    |
|                                         | HSC.IV.Sm <sub>ix</sub>  | 300 | 700 | 570 | 5000 | 0.0287 | 2.98 | 2.63 | 18  | 72       | hooked +<br>straight | 1    |
|                                         | HSC.III.S60/0.7/0.7<br>5 | 300 | 700 | 570 | 5000 | 0.0287 | 2.98 | 2.63 | 18  | 60.2     | hooked               | 0.75 |
| <b>Randl et al.<br/>2017</b>            | B19                      | 200 | 350 | 314 | 3000 | 0.0350 | 3.50 | 3.18 | 0.4 | 132      | straight<br>smooth   | 2    |
|                                         | B25                      | 200 | 350 | 314 | 3000 | 0.0350 | 3.50 | 3.18 | 0.4 | 154      | straight<br>smooth   | 2    |
|                                         | B30                      | 200 | 350 | 314 | 3000 | 0.0350 | 3.50 | 3.18 | 0.4 | 146      | straight<br>smooth   | 2    |
|                                         | B20                      | 200 | 350 | 314 | 3000 | 0.0350 | 3.50 | 3.18 | 0.4 | 133      | straight<br>smooth   | 1    |
|                                         | B24                      | 200 | 350 | 314 | 3000 | 0.0350 | 3.50 | 3.18 | 0.4 | 143      | straight<br>smooth   | 1    |
|                                         | B29                      | 200 | 350 | 314 | 3000 | 0.0350 | 3.50 | 3.18 | 0.4 | 153      | straight<br>smooth   | 1    |
| <b>Ashour et al.<br/>1992</b>           | B-2-1.0-L                | 125 | 250 | 215 | 1360 | 0.0037 | 2.00 | 1.95 | 10  | 92       | hooked               | 1    |
|                                         | B-4-1.0-L                | 125 | 250 | 215 | 2220 | 0.0037 | 4.00 | 3.95 | 10  | 92.6     | hooked               | 1    |
|                                         | B-6-1.0-L                | 125 | 250 | 215 | 3080 | 0.0037 | 6.00 | 5.95 | 10  | 93.7     | hooked               | 1    |
|                                         | B-1-0.5-A                | 125 | 250 | 215 | 930  | 0.0283 | 1.00 | 0.95 | 10  | 99       | hooked               | 0.5  |
|                                         | B-2-0.5-A                | 125 | 250 | 215 | 1360 | 0.0283 | 2.00 | 1.95 | 10  | 99.1     | hooked               | 0.5  |
|                                         | B-4-0.5-A                | 125 | 250 | 215 | 2220 | 0.0283 | 4.00 | 3.95 | 10  | 95.4     | hooked               | 0.5  |
|                                         | B-6-0.5-A                | 125 | 250 | 215 | 3080 | 0.0283 | 6.00 | 5.95 | 10  | 95.83    | hooked               | 0.5  |
|                                         | B-1-1.0-A                | 125 | 250 | 215 | 930  | 0.0283 | 1.00 | 0.95 | 10  | 95.3     | hooked               | 1    |
|                                         | B-2-1.0-A                | 125 | 250 | 215 | 1360 | 0.0283 | 2.00 | 1.95 | 10  | 95.3     | hooked               | 1    |
|                                         | B-4-1.0-A                | 125 | 250 | 215 | 2220 | 0.0283 | 4.00 | 3.95 | 10  | 97.53    | hooked               | 1    |
|                                         | B-6-1.0-A                | 125 | 250 | 215 | 3080 | 0.0283 | 6.00 | 5.95 | 10  | 100.5    | hooked               | 1    |
|                                         | B-1-1.5-A                | 125 | 250 | 215 | 930  | 0.0283 | 1.00 | 0.95 | 10  | 96.4     | hooked               | 1.5  |
|                                         | B-2-1.5-A                | 125 | 250 | 215 | 1360 | 0.0283 | 2.00 | 1.95 | 10  | 96.6     | hooked               | 1.5  |
|                                         | B-4-1.5-A                | 125 | 250 | 215 | 2220 | 0.0283 | 4.00 | 3.95 | 10  | 97.1     | hooked               | 1.5  |
|                                         | B-6-1.5-A                | 125 | 250 | 215 | 3080 | 0.0283 | 6.00 | 5.95 | 10  | 101.32   | hooked               | 1.5  |
|                                         | B-2-1.0-M                | 125 | 250 | 215 | 1360 | 0.0458 | 2.00 | 1.95 | 10  | 94.5     | hooked               | 1    |
|                                         | B-4-1.0-M                | 125 | 250 | 215 | 2220 | 0.0458 | 4.00 | 3.95 | 10  | 93.8     | hooked               | 1    |
|                                         | B-6-1.0-M                | 125 | 250 | 215 | 3080 | 0.0458 | 6.00 | 5.95 | 10  | 95       | hooked               | 1    |
| <b>Tan et al. 1993</b>                  | 2                        | 140 | 375 | 340 | 1910 | 0.0167 | 2.00 | 1.71 | 19  | 35       | hooked               | 0.5  |
|                                         | 3                        | 140 | 375 | 340 | 1910 | 0.0167 | 2.00 | 1.71 | 19  | 33       | hooked               | 0.75 |
|                                         | 4                        | 140 | 375 | 340 | 1910 | 0.0167 | 2.00 | 1.71 | 19  | 36       | hooked               | 1    |
|                                         | 5                        | 140 | 375 | 340 | 1910 | 0.0167 | 2.50 | 2.21 | 19  | 36       | hooked               | 1    |
|                                         | 6                        | 140 | 375 | 340 | 1910 | 0.0167 | 1.50 | 1.21 | 19  | 36       | hooked               | 1    |
| <b>Pansuk et al.<br/>2017</b>           | NS08                     | 150 | 400 | 350 | 2000 | 0.0561 | 2.86 | 2.57 | 2   | 121.1058 | hooked               | 0.8  |
|                                         | NS16                     | 150 | 400 | 350 | 2000 | 0.0561 | 2.86 | 2.57 | 2   | 120.3022 | hooked               | 1.6  |
| <b>Kim et al. 2017</b>                  | 21FB                     | 260 | 400 | 340 | 3120 | 0.0172 | 4.00 | 3.71 | 10  | 21       | hooked               | 0.75 |
|                                         | 60FB                     | 260 | 400 | 340 | 3120 | 0.0172 | 4.00 | 3.71 | 10  | 56       | hooked               | 0.75 |
| <b>Sharma, 1986</b>                     | S3F                      | 150 | 300 | 276 | 1600 | 0.0146 | 1.81 | 1.78 | 10  | 48.6     | hooked               | 0.96 |
| <b>Narayanan &amp;<br/>Darwish 1988</b> | D2                       | 100 | 400 | 345 | 1000 | 0.0355 | 0.70 | 0.43 | 5   | 52.89    | crimped              | 0.25 |
|                                         | D3                       | 100 | 400 | 345 | 1000 | 0.0355 | 0.70 | 0.43 | 5   | 51.004   | crimped              | 0.5  |
|                                         | D4                       | 100 | 400 | 345 | 1000 | 0.0355 | 0.70 | 0.43 | 5   | 47.56    | crimped              | 0.75 |
|                                         | D5                       | 100 | 400 | 345 | 1000 | 0.0355 | 0.70 | 0.43 | 5   | 55.924   | crimped              | 1    |
|                                         | D6                       | 100 | 400 | 345 | 1000 | 0.0355 | 0.70 | 0.43 | 5   | 54.94    | crimped              | 1.25 |
|                                         | D7                       | 100 | 400 | 345 | 1000 | 0.0355 | 0.46 | 0.20 | 5   | 50.512   | crimped              | 1    |

|                                             |        |      |     |     |      |        |      |      |      |        |         |      |
|---------------------------------------------|--------|------|-----|-----|------|--------|------|------|------|--------|---------|------|
| <b><i>Li, Ward &amp;<br/>Hamza 1992</i></b> | D8     | 100  | 400 | 345 | 1000 | 0.0355 | 0.58 | 0.32 | 5    | 47.806 | crimped | 1    |
|                                             | D9     | 100  | 400 | 345 | 1000 | 0.0355 | 0.81 | 0.55 | 5    | 45.592 | crimped | 1    |
|                                             | D10    | 100  | 400 | 345 | 1000 | 0.0355 | 0.93 | 0.67 | 5    | 49.118 | crimped | 1    |
|                                             | D11    | 100  | 400 | 345 | 1000 | 0.0355 | 0.70 | 0.43 | 5    | 30.996 | crimped | 1    |
|                                             | D12    | 100  | 400 | 345 | 1000 | 0.0355 | 0.70 | 0.43 | 5    | 34.686 | crimped | 1    |
|                                             | M1     | 63.5 | 127 | 102 | 612  | 0.0220 | 3.00 | 2.88 | 2.36 | 53     | crimped | 1    |
|                                             | M2     | 127  | 228 | 204 | 1224 | 0.0221 | 3.00 | 2.88 | 2.36 | 53     | crimped | 1    |
|                                             | M3     | 63.5 | 127 | 102 | 612  | 0.0220 | 3.00 | 2.88 | 2.36 | 50.2   | crimped | 2    |
|                                             | M4     | 127  | 228 | 204 | 1224 | 0.0221 | 3.00 | 2.88 | 2.36 | 50.2   | crimped | 2    |
|                                             | M5     | 63.5 | 127 | 102 | 612  | 0.0220 | 3.00 | 2.88 | 2.36 | 62.6   | crimped | 1    |
|                                             | M6     | 127  | 228 | 204 | 1224 | 0.0221 | 3.00 | 2.88 | 2.36 | 62.6   | crimped | 1    |
|                                             | M8     | 63.5 | 127 | 102 | 204  | 0.0220 | 1.00 | 0.88 | 2.36 | 62.6   | crimped | 1    |
|                                             | M9     | 63.5 | 127 | 102 | 306  | 0.0220 | 1.50 | 1.38 | 2.36 | 62.6   | crimped | 1    |
|                                             | M10    | 63.5 | 127 | 102 | 357  | 0.0220 | 1.75 | 1.63 | 2.36 | 62.6   | crimped | 1    |
|                                             | M11    | 63.5 | 127 | 102 | 408  | 0.0220 | 2.00 | 1.88 | 2.36 | 62.6   | crimped | 1    |
|                                             | M12    | 63.5 | 127 | 102 | 459  | 0.0220 | 2.25 | 2.13 | 2.36 | 62.6   | crimped | 1    |
|                                             | M13    | 63.5 | 127 | 102 | 510  | 0.0220 | 2.50 | 2.38 | 2.36 | 62.6   | crimped | 1    |
|                                             | M14    | 63.5 | 127 | 102 | 561  | 0.0220 | 2.75 | 2.63 | 2.36 | 62.6   | crimped | 1    |
|                                             | M15    | 63.5 | 127 | 102 | 612  | 0.0110 | 3.00 | 2.88 | 2.36 | 62.6   | crimped | 1    |
|                                             | M16    | 63.5 | 127 | 102 | 612  | 0.0330 | 3.00 | 2.88 | 2.36 | 62.6   | crimped | 1    |
|                                             | M17    | 63.5 | 127 | 102 | 612  | 0.0330 | 3.00 | 2.88 | 2.36 | 54.1   | crimped | 1    |
|                                             | C1     | 127  | 228 | 204 | 1224 | 0.0221 | 3.00 | 2.88 | 9    | 22.7   | hooked  | 1    |
|                                             | C2     | 63.5 | 127 | 102 | 612  | 0.0220 | 3.00 | 2.88 | 9    | 22.7   | hooked  | 1    |
|                                             | C3     | 63.5 | 127 | 102 | 612  | 0.0110 | 3.00 | 2.88 | 9    | 22.7   | hooked  | 1    |
|                                             | C4     | 63.5 | 127 | 102 | 306  | 0.0110 | 1.50 | 1.38 | 9    | 22.7   | hooked  | 1    |
|                                             | C5     | 127  | 228 | 204 | 1224 | 0.0221 | 3.00 | 2.88 | 9    | 26     | hooked  | 1    |
|                                             | C6     | 63.5 | 127 | 102 | 612  | 0.0220 | 3.00 | 2.88 | 9    | 26     | hooked  | 1    |
| <b><i>Swamy et al.<br/>1993</i></b>         | 1TLF-1 | 55   | 300 | 265 | 3000 | 0.0431 | 2.00 | 1.62 | 14   | 36.49  | crimped | 1    |
|                                             | 1TLF-2 | 55   | 300 | 265 | 3000 | 0.0431 | 3.43 | 3.05 | 14   | 41.902 | crimped | 1    |
|                                             | 1TLF-3 | 55   | 300 | 265 | 3000 | 0.0431 | 4.91 | 4.53 | 14   | 36.9   | crimped | 1    |
|                                             | 2TLF-1 | 55   | 300 | 265 | 3000 | 0.0276 | 2.00 | 1.62 | 14   | 38.704 | crimped | 1    |
|                                             | 2TLF-2 | 55   | 300 | 265 | 3000 | 0.0276 | 3.43 | 3.05 | 14   | 33.948 | crimped | 1    |
|                                             | 2TLF-3 | 55   | 300 | 265 | 3000 | 0.0276 | 4.91 | 4.53 | 14   | 36.818 | crimped | 1    |
|                                             | 3TLF-1 | 55   | 300 | 265 | 3000 | 0.0155 | 2.00 | 1.62 | 14   | 36.572 | crimped | 1    |
| <b><i>Adebar et al.<br/>1997</i></b>        | FC2    | 150  | 610 | 560 | 1500 | 0.0214 | 1.63 | 1.34 | 14   | 54.1   | hooked  | 0.75 |
|                                             | FC3    | 150  | 610 | 560 | 1500 | 0.0214 | 1.63 | 1.34 | 14   | 49.9   | hooked  | 1.5  |
|                                             | FC8    | 150  | 610 | 560 | 1500 | 0.0214 | 1.63 | 1.34 | 14   | 54.8   | hooked  | 0.4  |
|                                             | FC9    | 150  | 610 | 560 | 1500 | 0.0214 | 1.63 | 1.34 | 14   | 56.5   | hooked  | 0.6  |
|                                             | FC10   | 150  | 610 | 560 | 1500 | 0.0214 | 1.63 | 1.34 | 14   | 46.9   | hooked  | 0.4  |
|                                             | FC11   | 150  | 610 | 560 | 1500 | 0.0214 | 1.63 | 1.34 | 14   | 40.8   | hooked  | 0.6  |

|                                            |                     |     |     |       |      |        |      |      |     |      |                 |       |
|--------------------------------------------|---------------------|-----|-----|-------|------|--------|------|------|-----|------|-----------------|-------|
| <b><i>Cho &amp; Kim 2003</i></b>           | <i>F30-0.5-13</i>   | 120 | 200 | 167.5 | 720  | 0.0132 | 1.43 | 1.25 | 13  | 25.7 | <i>hooked</i>   | 0.5   |
|                                            | <i>F30-1.0-13</i>   | 120 | 200 | 167.5 | 720  | 0.0132 | 1.43 | 1.25 | 13  | 25.3 | <i>hooked</i>   | 1     |
|                                            | <i>F30-1.5-13</i>   | 120 | 200 | 167.5 | 720  | 0.0132 | 1.43 | 1.25 | 13  | 23.9 | <i>hooked</i>   | 1.5   |
|                                            | <i>F50-0.5-13</i>   | 120 | 200 | 167.5 | 720  | 0.0132 | 1.43 | 1.25 | 13  | 57.8 | <i>hooked</i>   | 0.5   |
|                                            | <i>F60-1.0-13</i>   | 120 | 200 | 167.5 | 720  | 0.0132 | 1.43 | 1.25 | 13  | 61.5 | <i>hooked</i>   | 1     |
|                                            | <i>F70-0.5-19</i>   | 120 | 200 | 167.5 | 720  | 0.0282 | 1.43 | 1.25 | 13  | 70.5 | <i>hooked</i>   | 0.5   |
|                                            | <i>F70-1.0-19</i>   | 120 | 200 | 167.5 | 720  | 0.0282 | 1.43 | 1.25 | 13  | 67.3 | <i>hooked</i>   | 1     |
|                                            | <i>F70-1.5-19</i>   | 120 | 200 | 167.5 | 720  | 0.0282 | 1.43 | 1.25 | 13  | 67.3 | <i>hooked</i>   | 1.5   |
|                                            | <i>F80-0.5-16</i>   | 120 | 200 | 167.5 | 720  | 0.0200 | 1.43 | 1.25 | 13  | 82.4 | <i>hooked</i>   | 0.5   |
|                                            | <i>F80-1.0-16</i>   | 120 | 200 | 167.5 | 720  | 0.0200 | 1.43 | 1.25 | 13  | 81.1 | <i>hooked</i>   | 1     |
|                                            | <i>F80-0.5-19</i>   | 120 | 200 | 167.5 | 720  | 0.0282 | 1.43 | 1.25 | 13  | 86.1 | <i>hooked</i>   | 0.5   |
|                                            | <i>F80-1.0-19</i>   | 120 | 200 | 167.5 | 720  | 0.0282 | 1.43 | 1.25 | 13  | 89.4 | <i>hooked</i>   | 1     |
| <b><i>Greenough &amp; Nehdi 2008</i></b>   | <i>S-HE-50-0.5</i>  | 200 | 300 | 265   | 2000 | 0.0178 | 3.02 | 2.64 | 10  | 47.9 | <i>hooked</i>   | 0.5   |
|                                            | <i>S-HE-50-0.75</i> | 200 | 300 | 265   | 2000 | 0.0178 | 3.02 | 2.64 | 10  | 38   | <i>hooked</i>   | 0.75  |
|                                            | <i>S-HE-50-1.0</i>  | 200 | 300 | 265   | 2000 | 0.0178 | 3.02 | 2.64 | 10  | 42.2 | <i>hooked</i>   | 1     |
|                                            | <i>S-FE-50-0.5</i>  | 200 | 300 | 265   | 2000 | 0.0178 | 3.02 | 2.64 | 10  | 45.4 | <i>flat end</i> | 0.5   |
|                                            | <i>S-FE-50-0.75</i> | 200 | 300 | 265   | 2000 | 0.0178 | 3.02 | 2.64 | 10  | 44.4 | <i>flat end</i> | 0.75  |
|                                            | <i>S-FE-50-1.0</i>  | 200 | 300 | 265   | 2000 | 0.0178 | 3.02 | 2.64 | 10  | 40.3 | <i>flat end</i> | 1     |
|                                            | <i>S-FE-30-0.5</i>  | 200 | 300 | 265   | 2000 | 0.0178 | 3.02 | 2.64 | 10  | 53.7 | <i>flat end</i> | 0.5   |
|                                            | <i>S-FE-30-0.75</i> | 200 | 300 | 265   | 2000 | 0.0178 | 3.02 | 2.64 | 10  | 46   | <i>flat end</i> | 0.75  |
|                                            | <i>S-FE-30-1.0</i>  | 200 | 300 | 265   | 2000 | 0.0178 | 3.02 | 2.64 | 10  | 42.2 | <i>flat end</i> | 1     |
| <b><i>Kang et al. 2012</i></b>             | <i>FNB-50-1</i>     | 200 | 355 | 310   | 3560 | 0.0113 | 2.55 | 1.98 | 9.5 | 39.8 | <i>hooked</i>   | 0.375 |
|                                            | <i>FNB-50-3</i>     | 200 | 355 | 285   | 3560 | 0.0333 | 2.77 | 2.16 | 9.5 | 39.8 | <i>hooked</i>   | 0.375 |
| <b><i>Dupont &amp; Vandewalle 2003</i></b> | <i>2</i>            | 200 | 300 | 260   | 1800 | 0.0355 | 3.46 | 3.08 | 14  | 46.4 | <i>hooked</i>   | 0.25  |
|                                            | <i>3</i>            | 200 | 300 | 260   | 1800 | 0.0355 | 3.46 | 3.08 | 14  | 43.2 | <i>hooked</i>   | 0.5   |
|                                            | <i>4</i>            | 200 | 300 | 260   | 1800 | 0.0355 | 3.46 | 3.08 | 14  | 47.6 | <i>hooked</i>   | 0.75  |
|                                            | <i>14</i>           | 200 | 300 | 260   | 2300 | 0.0181 | 1.54 | 1.15 | 14  | 40.7 | <i>hooked</i>   | 0.25  |
|                                            | <i>15</i>           | 200 | 300 | 260   | 2300 | 0.0181 | 1.54 | 1.15 | 14  | 42.4 | <i>hooked</i>   | 0.75  |
|                                            | <i>17</i>           | 200 | 300 | 262   | 2300 | 0.0115 | 2.48 | 2.10 | 14  | 39.1 | <i>hooked</i>   | 0.25  |
|                                            | <i>18</i>           | 200 | 300 | 262   | 2300 | 0.0115 | 2.48 | 2.10 | 14  | 38.6 | <i>hooked</i>   | 0.75  |
|                                            | <i>20</i>           | 200 | 300 | 260   | 2300 | 0.0181 | 2.50 | 2.12 | 14  | 39.1 | <i>hooked</i>   | 0.25  |
|                                            | <i>21</i>           | 200 | 300 | 260   | 2300 | 0.0181 | 2.50 | 2.12 | 14  | 38.6 | <i>hooked</i>   | 0.75  |
|                                            | <i>23</i>           | 200 | 300 | 260   | 2300 | 0.0181 | 4.04 | 3.65 | 14  | 40.7 | <i>hooked</i>   | 0.25  |
|                                            | <i>24</i>           | 200 | 300 | 260   | 2300 | 0.0181 | 4.04 | 3.65 | 14  | 42.4 | <i>hooked</i>   | 0.75  |
|                                            | <i>26</i>           | 200 | 300 | 262   | 2300 | 0.0115 | 2.48 | 2.10 | 14  | 26.5 | <i>hooked</i>   | 0.25  |
|                                            | <i>27</i>           | 200 | 300 | 262   | 2300 | 0.0115 | 2.48 | 2.10 | 14  | 27.2 | <i>hooked</i>   | 0.75  |
|                                            | <i>29</i>           | 200 | 300 | 260   | 2300 | 0.0181 | 2.50 | 2.12 | 14  | 26.5 | <i>hooked</i>   | 0.25  |
|                                            | <i>30</i>           | 200 | 300 | 260   | 2300 | 0.0181 | 2.50 | 2.12 | 14  | 27.2 | <i>hooked</i>   | 0.75  |
|                                            | <i>31</i>           | 200 | 300 | 262   | 2300 | 0.0115 | 2.48 | 2.10 | 14  | 47.4 | <i>hooked</i>   | 0.5   |
|                                            | <i>32</i>           | 200 | 300 | 260   | 2300 | 0.0181 | 2.50 | 2.12 | 14  | 46.8 | <i>hooked</i>   | 0.5   |
|                                            | <i>33</i>           | 200 | 300 | 262   | 2300 | 0.0115 | 2.48 | 2.10 | 14  | 45.4 | <i>hooked</i>   | 0.5   |
|                                            | <i>41</i>           | 200 | 350 | 305   | 3250 | 0.0103 | 2.46 | 2.13 | 14  | 34.4 | <i>hooked</i>   | 0.57  |
|                                            | <i>43</i>           | 200 | 350 | 305   | 3250 | 0.0103 | 2.46 | 2.13 | 14  | 30.2 | <i>hooked</i>   | 0.38  |



|                                   |     |     |     |     |        |        |      |      |    |        |         |      |
|-----------------------------------|-----|-----|-----|-----|--------|--------|------|------|----|--------|---------|------|
| <b>Swamy &amp; Bahia<br/>1985</b> | B52 | 175 | 250 | 210 | 2800   | 0.0401 | 4.50 | 4.26 | 10 | 36.408 | crimped | 0.4  |
|                                   | B53 | 175 | 250 | 210 | 2800   | 0.0401 | 4.50 | 4.26 | 10 | 38.376 | crimped | 0.8  |
|                                   | B54 | 175 | 250 | 210 | 2800   | 0.0401 | 4.50 | 4.26 | 10 | 40.836 | crimped | 1.2  |
|                                   | B55 | 175 | 250 | 210 | 2800   | 0.0310 | 4.50 | 4.26 | 10 | 39.114 | crimped | 0.8  |
|                                   | B59 | 175 | 250 | 210 | 2800   | 0.0401 | 4.50 | 4.26 | 10 | 38.54  | crimped | 0.8  |
| <b>Batson et al. 1972</b>         | H1  | 101 | 152 | 127 | 1828.8 | 0.0309 | 4.80 | 4.01 | 2  | 33.22  | flat    | 0.22 |
|                                   | H2  | 101 | 152 | 127 | 1828.8 | 0.0309 | 4.80 | 4.01 | 2  | 33.22  | flat    | 0.22 |
|                                   | H3  | 101 | 152 | 127 | 1828.8 | 0.0309 | 4.80 | 4.01 | 2  | 33.22  | flat    | 0.22 |
|                                   | I1  | 101 | 152 | 127 | 1828.8 | 0.0309 | 4.80 | 4.01 | 2  | 33.22  | crimped | 0.22 |
|                                   | I2  | 101 | 152 | 127 | 1828.8 | 0.0309 | 4.80 | 4.01 | 2  | 33.22  | crimped | 0.22 |
|                                   | I3  | 101 | 152 | 127 | 1828.8 | 0.0309 | 4.80 | 4.01 | 2  | 33.22  | crimped | 0.22 |
|                                   | A2  | 101 | 152 | 127 | 1828.8 | 0.0309 | 4.80 | 4.01 | 2  | 33.22  | round   | 0.22 |
|                                   | B3  | 101 | 152 | 127 | 1828.8 | 0.0309 | 4.40 | 3.61 | 2  | 33.22  | round   | 0.22 |
|                                   | C1  | 101 | 152 | 127 | 1828.8 | 0.0309 | 4.20 | 3.41 | 2  | 33.22  | round   | 0.22 |
|                                   | C2  | 101 | 152 | 127 | 1828.8 | 0.0309 | 4.20 | 3.41 | 2  | 33.22  | round   | 0.22 |
|                                   | C3  | 101 | 152 | 127 | 1828.8 | 0.0309 | 4.20 | 3.41 | 2  | 33.22  | round   | 0.22 |
|                                   | D2  | 101 | 152 | 127 | 1828.8 | 0.0309 | 4.30 | 3.51 | 2  | 33.22  | round   | 0.22 |
|                                   | D3  | 101 | 152 | 127 | 1828.8 | 0.0309 | 4.30 | 3.51 | 2  | 33.22  | round   | 0.22 |
|                                   | E3  | 101 | 152 | 127 | 1828.8 | 0.0309 | 4.20 | 3.41 | 2  | 40.21  | round   | 0.44 |
|                                   | F1  | 101 | 152 | 127 | 1828.8 | 0.0309 | 4.00 | 3.21 | 2  | 40.21  | round   | 0.44 |
|                                   | F2  | 101 | 152 | 127 | 1828.8 | 0.0309 | 4.00 | 3.21 | 2  | 40.21  | round   | 0.44 |
|                                   | F3  | 101 | 152 | 127 | 1828.8 | 0.0309 | 4.00 | 3.21 | 2  | 40.21  | round   | 0.44 |
|                                   | G1  | 101 | 152 | 127 | 1828.8 | 0.0309 | 4.40 | 3.61 | 2  | 33.22  | round   | 0.22 |
|                                   | G3  | 101 | 152 | 127 | 1828.8 | 0.0309 | 4.40 | 3.61 | 2  | 33.22  | round   | 0.22 |
|                                   | L1  | 101 | 152 | 127 | 1828.8 | 0.0309 | 4.00 | 3.21 | 2  | 33.22  | crimped | 0.22 |
|                                   | L2  | 101 | 152 | 127 | 1828.8 | 0.0309 | 4.00 | 3.21 | 2  | 33.22  | crimped | 0.22 |
|                                   | L3  | 101 | 152 | 127 | 1828.8 | 0.0309 | 4.00 | 3.21 | 2  | 33.22  | crimped | 0.22 |
|                                   | M1  | 101 | 152 | 127 | 1828.8 | 0.0309 | 4.60 | 3.81 | 2  | 33.22  | crimped | 0.22 |
|                                   | M2  | 101 | 152 | 127 | 1828.8 | 0.0309 | 4.40 | 3.61 | 2  | 33.22  | crimped | 0.22 |
|                                   | M3  | 101 | 152 | 127 | 1828.8 | 0.0309 | 4.40 | 3.61 | 2  | 33.22  | crimped | 0.22 |
|                                   | N1  | 101 | 152 | 127 | 1828.8 | 0.0309 | 5.00 | 4.21 | 2  | 33.22  | crimped | 0.22 |
|                                   | N2  | 101 | 152 | 127 | 1828.8 | 0.0309 | 4.80 | 4.01 | 2  | 33.22  | crimped | 0.22 |
|                                   | O1  | 101 | 152 | 127 | 1828.8 | 0.0309 | 4.00 | 3.21 | 2  | 40.21  | crimped | 0.44 |
|                                   | P1  | 101 | 152 | 127 | 1828.8 | 0.0309 | 4.20 | 3.41 | 2  | 40.21  | crimped | 0.44 |
|                                   | P2  | 101 | 152 | 127 | 1828.8 | 0.0309 | 4.20 | 3.41 | 2  | 40.21  | crimped | 0.44 |
|                                   | P3  | 101 | 152 | 127 | 1828.8 | 0.0309 | 4.20 | 3.41 | 2  | 40.21  | crimped | 0.44 |
|                                   | R1  | 101 | 152 | 127 | 1828.8 | 0.0309 | 3.20 | 2.41 | 2  | 39.72  | crimped | 0.88 |
|                                   | R2  | 101 | 152 | 127 | 1828.8 | 0.0309 | 3.40 | 2.61 | 2  | 39.72  | crimped | 0.88 |
|                                   | S1  | 101 | 152 | 127 | 1828.8 | 0.0309 | 3.40 | 2.61 | 2  | 39.72  | crimped | 0.88 |
|                                   | S2  | 101 | 152 | 127 | 1828.8 | 0.0309 | 3.40 | 2.61 | 2  | 39.72  | crimped | 0.88 |
|                                   | S3  | 101 | 152 | 127 | 1828.8 | 0.0309 | 3.40 | 2.61 | 2  | 39.72  | crimped | 0.88 |
|                                   | U1  | 101 | 152 | 127 | 1828.8 | 0.0309 | 2.80 | 2.01 | 2  | 39.79  | crimped | 1.76 |
|                                   | V2  | 101 | 152 | 127 | 1828.8 | 0.0309 | 1.80 | 1.01 | 2  | 39.79  | crimped | 1.76 |
|                                   | W1  | 101 | 152 | 127 | 1828.8 | 0.0309 | 1.20 | 0.41 | 2  | 39.79  | crimped | 1.76 |
|                                   | W2  | 101 | 152 | 127 | 1828.8 | 0.0309 | 1.20 | 0.41 | 2  | 39.79  | crimped | 1.76 |
|                                   | X1  | 101 | 152 | 127 | 1828.8 | 0.0309 | 4.80 | 4.01 | 2  | 33.22  | crimped | 0.22 |

|                                               |             |       |       |         |        |        |      |      |       |          |                                         |      |
|-----------------------------------------------|-------------|-------|-------|---------|--------|--------|------|------|-------|----------|-----------------------------------------|------|
|                                               | X2          | 101   | 152   | 127     | 1828.8 | 0.0309 | 4.80 | 4.01 | 2     | 33.22    | <i>crimped</i>                          | 0.22 |
|                                               | X3          | 101   | 152   | 127     | 1828.8 | 0.0309 | 4.80 | 4.01 | 2     | 33.22    | <i>crimped</i>                          | 0.22 |
| <b>Zhao et al. 2018</b>                       | S0005       | 150   | 300   | 259.5   | 2100   | 0.0252 | 2.00 | 1.61 | 20    | 34.45    | <i>mill-cut</i>                         | 0.5  |
|                                               | S0010       | 150   | 300   | 259.5   | 2100   | 0.0252 | 2.00 | 1.61 | 20    | 36.08    | <i>mill-cut</i>                         | 1    |
|                                               | S0015       | 150   | 300   | 259.5   | 2100   | 0.0252 | 2.00 | 1.61 | 20    | 37.13    | <i>mill-cut</i>                         | 1.5  |
|                                               | S0020       | 150   | 300   | 259.5   | 2100   | 0.0252 | 2.00 | 1.61 | 20    | 35.26    | <i>mill-cut</i>                         | 2    |
| <b>Jindal 1984</b>                            | C1          | 100   | 152.6 | 127     | 1524   | 0.0199 | 3.60 | 3.52 | 2     | 20.68966 | <i>straight mild steel</i>              | 1    |
|                                               | G1          | 100   | 152.6 | 127     | 762    | 0.0199 | 2.00 | 1.92 | 2     | 20.68966 | <i>brass-coated high strength steel</i> | 1    |
|                                               | G2          | 100   | 152.6 | 127     | 762    | 0.0199 | 2.40 | 2.32 | 2     | 20.68966 | <i>brass-coated high strength steel</i> | 1    |
|                                               | H1          | 100   | 152.6 | 127     | 762    | 0.0199 | 2.00 | 1.92 | 2     | 20.68966 | <i>brass-coated high strength steel</i> | 1    |
|                                               | H3          | 100   | 152.6 | 127     | 1524   | 0.0199 | 3.60 | 3.52 | 2     | 20.68966 | <i>brass-coated high strength steel</i> | 1    |
|                                               | H4          | 100   | 152.6 | 127     | 1524   | 0.0199 | 4.80 | 4.72 | 2     | 20.68966 | <i>brass-coated high strength steel</i> | 1    |
|                                               | J1          | 100   | 152.6 | 127     | 762    | 0.0199 | 2.00 | 1.92 | 2     | 20.68966 | <i>brass-coated high strength steel</i> | 1    |
| <b>Shin, Oh &amp; Ghosh 1994</b>              | 2-0.5-0.5   | 100   | 200   | 175     | 700    | 0.0359 | 2.00 | 1.94 | 13    | 80       | <i>smooth straight</i>                  | 0.5  |
|                                               | 2-0.5-1     | 100   | 200   | 175     | 700    | 0.0359 | 2.00 | 1.94 | 13    | 80       | <i>smooth straight</i>                  | 1    |
|                                               | 3-0.5-0.5   | 100   | 200   | 175     | 1050   | 0.0359 | 3.00 | 2.94 | 13    | 80       | <i>smooth straight</i>                  | 0.5  |
|                                               | 3-0.5-1     | 100   | 200   | 175     | 1050   | 0.0359 | 3.00 | 2.94 | 13    | 80       | <i>smooth straight</i>                  | 1    |
|                                               | 4.5-0.5-0.5 | 100   | 200   | 175     | 1575   | 0.0359 | 4.50 | 4.44 | 13    | 80       | <i>smooth straight</i>                  | 0.5  |
|                                               | 4.5-0.5-1   | 100   | 200   | 175     | 1575   | 0.0359 | 4.50 | 4.44 | 13    | 80       | <i>smooth straight</i>                  | 1    |
| <b>Imam, Vandewalle &amp; Mortelmans 1994</b> | B16         | 200   | 350   | 300     | 3250   | 0.0308 | 1.75 | 1.42 | 10    | 109.5    | <i>hooked</i>                           | 0.75 |
|                                               | B6          | 200   | 350   | 300     | 3250   | 0.0308 | 2.50 | 2.17 | 10    | 110      | <i>hooked</i>                           | 0.75 |
|                                               | B7          | 200   | 350   | 300     | 3250   | 0.0308 | 3.50 | 3.17 | 10    | 111.5    | <i>hooked</i>                           | 0.75 |
|                                               | B12         | 200   | 350   | 300     | 3250   | 0.0308 | 4.50 | 4.17 | 10    | 110.8    | <i>hooked</i>                           | 0.75 |
| <b>Huang et al. 2005 [106]</b>                | PB14        | 150   | 300   | 255     | 2000   | 0.0493 | 1.96 | 1.57 | 20    | 55.842   | <i>chopped with butt ends</i>           | 1    |
| <b>Kwak, Suh &amp; Hsu 1991</b>               | IAS1        | 152.4 | 304.8 | 282.575 | 1524   | 0.0199 | 2.50 | 2.14 | 9.525 | 33.06897 | <i>hooked</i>                           | 1    |
|                                               | IAS2        | 152.4 | 304.8 | 282.575 | 1524   | 0.0199 | 2.50 | 2.14 | 9.525 | 33.24138 | <i>hooked</i>                           | 1    |
|                                               | IBS1        | 152.4 | 304.8 | 282.575 | 1524   | 0.0199 | 2.50 | 2.14 | 9.525 | 33.03448 | <i>hooked</i>                           | 2    |
|                                               | IBS2        | 152.4 | 304.8 | 282.575 | 1524   | 0.0199 | 2.50 | 2.14 | 9.525 | 34.37931 | <i>hooked</i>                           | 2    |
| <b>Roberts &amp; Ho 1982</b>                  | F3.0B1      | 50    | 200   | 170     | 820    | 0.0237 | 2.41 | 2.12 | 10    | 32.062   | <i>brass-coated high strength steel</i> | 3    |
|                                               | F4.5B1      | 50    | 200   | 170     | 820    | 0.0237 | 2.41 | 2.12 | 10    | 39.278   | <i>brass-coated high strength steel</i> | 4.5  |
|                                               | F3.0B2      | 50    | 200   | 170     | 552    | 0.0237 | 1.62 | 1.33 | 10    | 32.062   | <i>brass-coated high strength steel</i> | 3    |
|                                               | F4.5B2      | 50    | 200   | 170     | 552    | 0.0237 | 1.62 | 1.33 | 10    | 39.278   | <i>brass-coated high strength steel</i> | 4.5  |
|                                               | F3.0B3      | 50    | 200   | 170     | 274    | 0.0237 | 0.81 | 0.51 | 10    | 32.062   | <i>brass-coated high strength steel</i> | 3    |
|                                               | F4.5B3      | 50    | 200   | 170     | 274    | 0.0237 | 0.81 | 0.51 | 10    | 39.278   | <i>brass-coated high strength steel</i> | 4.5  |
| <b>Hwang et al. 2013</b>                      | S-35-0.5    | 100   | 200   | 165.5   | 1500   | 0.0343 | 3.02 | 2.96 | 10    | 39.4     | <i>hooked</i>                           | 0.5  |
|                                               | S-35-1.0    | 100   | 200   | 165.5   | 1500   | 0.0343 | 3.02 | 2.96 | 10    | 39.2     | <i>hooked</i>                           | 1    |
|                                               | S-35-1.5    | 100   | 200   | 165.5   | 1500   | 0.0343 | 3.02 | 2.96 | 10    | 40       | <i>hooked</i>                           | 1.5  |
|                                               | S-35-2.0    | 100   | 200   | 165.5   | 1500   | 0.0343 | 3.02 | 2.96 | 10    | 35.5     | <i>hooked</i>                           | 2    |
|                                               | HS-50-1.0   | 100   | 200   | 159     | 1500   | 0.0478 | 3.14 | 3.08 | 10    | 58       | <i>hooked</i>                           | 1    |
|                                               | HS-70-00.5  | 100   | 200   | 159     | 1500   | 0.0478 | 3.14 | 3.08 | 10    | 80.1     | <i>hooked</i>                           | 0.5  |
|                                               | HS-70-1.0   | 100   | 200   | 159     | 1500   | 0.0478 | 3.14 | 3.08 | 10    | 88       | <i>hooked</i>                           | 1    |

|                                                |            |     |      |       |      |        |      |      |      |       |          |       |
|------------------------------------------------|------------|-----|------|-------|------|--------|------|------|------|-------|----------|-------|
| <b>Spinella et al.2012</b>                     | A10        | 150 | 250  | 219   | 2300 | 0.0191 | 2.80 | 2.75 | 10   | 80.04 | hooked   | 1     |
|                                                | B10        | 150 | 250  | 219   | 2300 | 0.0191 | 2.00 | 1.95 | 10   | 80.04 | hooked   | 1     |
| <b>Chalioris &amp; Sfiri, 2011</b>             | MF40       | 100 | 300  | 275   | 1450 | 0.0055 | 2.00 | 1.96 | 9.5  | 28.4  | hooked   | 0.5   |
| <b>Cohen &amp; Aoude, 2012</b>                 | M15-0.5%   | 125 | 250  | 212   | 2400 | 0.0152 | 3.77 | 3.07 | 10   | 59.4  | hooked   | 0.5   |
| <b>Aoude &amp; Cohen 2014</b>                  | M15-0.5%H  | 125 | 250  | 212   | 2400 | 0.0152 | 3.77 | 3.07 | 10   | 49.6  | hooked   | 0.5   |
|                                                | M20-0.75%  | 125 | 250  | 210   | 2400 | 0.0228 | 3.81 | 3.10 | 10   | 49.7  | hooked   | 0.75  |
|                                                | M20-1.0%   | 125 | 250  | 210   | 2400 | 0.0228 | 3.81 | 3.10 | 10   | 51.5  | hooked   | 1     |
|                                                | M20-1.0%A  | 125 | 250  | 210   | 2400 | 0.0228 | 3.81 | 3.10 | 12   | 54.5  | hooked   | 1     |
| <b>Qissab &amp; Salman 2018</b>                | G1B2       | 100 | 170  | 140   | 1100 | 0.0112 | 1.07 | 0.50 | 12.5 | 36.08 | hooked   | 0.5   |
|                                                | G1B3       | 100 | 170  | 140   | 1100 | 0.0112 | 1.07 | 0.50 | 12.5 | 36.9  | hooked   | 0.75  |
|                                                | G1B5       | 100 | 170  | 140   | 1100 | 0.0112 | 2.50 | 1.93 | 12.5 | 36.08 | hooked   | 0.5   |
|                                                | G1B6       | 100 | 170  | 140   | 1100 | 0.0112 | 2.50 | 1.93 | 12.5 | 36.9  | hooked   | 0.75  |
|                                                | G2B2       | 100 | 180  | 150   | 1100 | 0.0105 | 1.00 | 0.47 | 12.5 | 36.08 | hooked   | 0.5   |
|                                                | G2B3       | 100 | 180  | 150   | 1100 | 0.0105 | 1.00 | 0.47 | 12.5 | 36.9  | hooked   | 0.75  |
|                                                | G2B5       | 100 | 180  | 150   | 1100 | 0.0105 | 2.33 | 1.80 | 12.5 | 36.08 | hooked   | 0.5   |
|                                                | G2B6       | 100 | 180  | 150   | 1100 | 0.0105 | 2.33 | 1.80 | 12.5 | 36.9  | hooked   | 0.75  |
|                                                | G3B1       | 100 | 200  | 170   | 1100 | 0.0092 | 2.41 | 1.94 | 12.5 | 36.08 | hooked   | 0.5   |
|                                                | G3B2       | 100 | 200  | 170   | 1100 | 0.0092 | 1.29 | 0.82 | 12.5 | 36.08 | hooked   | 0.5   |
|                                                | G3B3       | 100 | 275  | 245   | 1100 | 0.0064 | 0.90 | 0.57 | 12.5 | 36.08 | hooked   | 0.5   |
| <b>Furlan &amp; de Hanai 1997</b>              | P3B        | 100 | 100  | 85.25 | 900  | 0.0166 | 3.52 | 3.40 | 10   | 54.8  | crimped  | 1     |
|                                                | P4B        | 100 | 100  | 85.25 | 900  | 0.0166 | 3.52 | 3.40 | 10   | 50    | crimped  | 2     |
|                                                | P5A        | 100 | 100  | 85.25 | 900  | 0.0166 | 3.52 | 3.40 | 10   | 49.3  | crimped  | 1     |
|                                                | P5B        | 100 | 100  | 85.25 | 900  | 0.0166 | 3.52 | 3.40 | 10   | 49.3  | crimped  | 1     |
|                                                | P6B        | 100 | 100  | 85.25 | 900  | 0.0166 | 3.52 | 3.40 | 10   | 53.7  | crimped  | 2     |
|                                                | P7A        | 100 | 100  | 85.25 | 900  | 0.0166 | 3.52 | 3.40 | 10   | 53.5  | crimped  | 0.5   |
|                                                | P7B        | 100 | 100  | 85.25 | 900  | 0.0166 | 3.52 | 3.40 | 10   | 53.5  | crimped  | 0.5   |
| <b>Dancygier &amp; Savir 2011</b>              | H3-S0-1_35 | 200 | 325  | 273   | 2000 | 0.0348 | 2.75 | 2.71 | 22   | 110.9 | hooked   | 0.75  |
|                                                | H3-S0-1_60 | 200 | 325  | 273   | 2000 | 0.0348 | 2.75 | 2.71 | 22   | 109.2 | hooked   | 0.75  |
| <b>Krassowska &amp; Kosior-Kazberuk 2018</b>   | A-IV-WS1.0 | 80  | 180  | 165   | 987  | 0.0171 | 2.99 | 2.83 | 4    | 41.23 | hooked   | 1     |
|                                                | A-IV-WS1.5 | 80  | 180  | 165   | 987  | 0.0171 | 2.99 | 2.83 | 4    | 39.87 | hooked   | 1.5   |
| <b>Yoo &amp; Yang 2018</b>                     | S-F0.75    | 300 | 500  | 420   | 3700 | 0.0322 | 3.21 | 3.19 | 20   | 62.3  | hooked   | 0.75  |
|                                                | M-F0.75    | 450 | 750  | 648   | 5220 | 0.0327 | 3.26 | 3.24 | 20   | 62.3  | hooked   | 0.75  |
|                                                | L-F0.75    | 600 | 1000 | 887   | 6780 | 0.0343 | 3.26 | 3.25 | 20   | 62.3  | hooked   | 0.75  |
| <b>Gali &amp; Subramaniam 2017</b>             | SFRC_0.5_1 | 125 | 250  | 222   | 1200 | 0.0145 | 1.80 | 1.76 | 10   | 30    | hooked   | 0.5   |
|                                                | SFRC_0.5_2 | 125 | 250  | 222   | 1200 | 0.0145 | 1.80 | 1.76 | 10   | 30    | hooked   | 0.5   |
| <b>Zamanzadeh et al. 2015</b>                  | S_W70      | 70  | 300  | 270   | 1040 | 0.0332 | 2.56 | 2.52 | 10   | 50    | recycled | 0.769 |
|                                                | S_W110     | 110 | 300  | 270   | 1040 | 0.0212 | 2.56 | 2.52 | 10   | 50    | recycled | 0.769 |
|                                                | S_W150     | 150 | 300  | 270   | 1040 | 0.0155 | 2.56 | 2.52 | 10   | 50    | recycled | 0.769 |
| <b>Shoaib, Lubell &amp; Bindiganavile 2014</b> | N31        | 310 | 308  | 258   | 1548 | 0.0250 | 3.00 | 2.42 | 10   | 23    | hooked   | 1     |
|                                                | N32        | 310 | 308  | 240   | 1440 | 0.0403 | 3.00 | 2.38 | 10   | 41    | hooked   | 1     |

|                                             |                  |     |      |     |      |        |      |      |    |      |                   |     |
|---------------------------------------------|------------------|-----|------|-----|------|--------|------|------|----|------|-------------------|-----|
| <b><i>Shoaib, 2012</i></b>                  | <i>H31</i>       | 310 | 308  | 258 | 1548 | 0.0250 | 3.00 | 2.42 | 10 | 41   | <i>hooked</i>     | 1   |
|                                             | <i>H32</i>       | 310 | 308  | 240 | 1440 | 0.0403 | 3.00 | 2.38 | 10 | 80   | <i>hooked</i>     | 1   |
|                                             | <i>N61</i>       | 300 | 600  | 531 | 3186 | 0.0188 | 3.00 | 2.72 | 10 | 23   | <i>hooked</i>     | 1   |
|                                             | <i>N62</i>       | 300 | 600  | 523 | 3138 | 0.0255 | 3.00 | 2.71 | 10 | 23   | <i>hooked</i>     | 1   |
|                                             | <i>H62</i>       | 300 | 600  | 523 | 3138 | 0.0255 | 3.00 | 2.71 | 10 | 41   | <i>hooked</i>     | 1   |
|                                             | <i>N10-1</i>     | 300 | 1000 | 923 | 5538 | 0.0144 | 3.00 | 2.84 | 10 | 41   | <i>hooked</i>     | 1   |
|                                             | <i>N10-2</i>     | 300 | 1000 | 920 | 5520 | 0.0203 | 3.00 | 2.84 | 10 | 41   | <i>hooked</i>     | 1   |
|                                             | <i>H10-1</i>     | 300 | 1000 | 923 | 5538 | 0.0144 | 3.00 | 2.84 | 10 | 80   | <i>hooked</i>     | 1   |
|                                             | <i>H10-2</i>     | 300 | 1000 | 920 | 5520 | 0.0203 | 3.00 | 2.84 | 10 | 80   | <i>hooked</i>     | 1   |
|                                             |                  |     |      |     |      |        |      |      |    |      |                   |     |
| <b><i>Bae, Choi &amp; Choi<br/>2014</i></b> | <i>U-0-f-3.5</i> | 200 | 350  | 300 | 2300 | 0.0360 | 3.50 | 3.17 | 2  | 215  | <i>hooked</i>     | 2   |
|                                             | <i>U-0-f-2.0</i> | 200 | 350  | 300 | 1200 | 0.0360 | 2.00 | 1.67 | 2  | 199  | <i>hooked</i>     | 2   |
| <b><i>Abdul-Zaher et<br/>al. 2016</i></b>   | <i>B2</i>        | 120 | 300  | 266 | 1100 | 0.0126 | 1.13 | 1.09 | 20 | 31.9 | <i>corrugated</i> | 0.2 |
|                                             | <i>B3</i>        | 120 | 300  | 266 | 1100 | 0.0126 | 1.13 | 1.09 | 20 | 31.9 | <i>corrugated</i> | 0.4 |
|                                             | <i>B4</i>        | 120 | 300  | 266 | 1100 | 0.0126 | 1.13 | 1.09 | 20 | 31.9 | <i>corrugated</i> | 0.6 |

| Table S2: Properties of Steel Fiber         |         |            |            |             |       |              |       |              |
|---------------------------------------------|---------|------------|------------|-------------|-------|--------------|-------|--------------|
| Reference                                   | $l/d_f$ | $f_{tenf}$ | $v_{utot}$ | $v_{u,tot}$ | $d_t$ | $d_{aggmax}$ | F     | Failure Mode |
|                                             | (-)     | (MPa)      | (kN)       | (MPa)       | (mm)  | mm           |       |              |
| Singh & Jain<br>2014                        | 65      | 1100       | 114        | 3.022       | 0.55  | 12.5         | 0.488 | DT + ST + SC |
|                                             | 65      | 1100       | 80         | 2.122       | 0.55  | 12.5         | 0.488 | DT + ST + SC |
|                                             | 65      | 1100       | 110        | 2.922       | 0.55  | 12.5         | 0.650 | DT + ST + SC |
|                                             | 65      | 1100       | 124        | 3.302       | 0.55  | 12.5         | 0.650 | DT + ST + SC |
|                                             | 65      | 1100       | 112        | 2.972       | 0.55  | 12.5         | 0.975 | DT + ST + SC |
|                                             | 65      | 1100       | 132        | 3.502       | 0.55  | 12.5         | 0.975 | DT + ST + SC |
|                                             | 80      | 1050       | 66         | 1.742       | 0.75  | 12.5         | 0.400 | DT + ST + SC |
|                                             | 80      | 1050       | 78         | 2.072       | 0.75  | 12.5         | 0.400 | DT + ST + SC |
|                                             | 80      | 1050       | 92         | 2.442       | 0.75  | 12.5         | 0.600 | DT + ST + SC |
|                                             | 80      | 1050       | 102        | 2.722       | 0.75  | 12.5         | 0.600 | DT + ST + SC |
|                                             | 80      | 1050       | 117        | 3.102       | 0.75  | 12.5         | 0.800 | DT + ST + SC |
|                                             | 80      | 1050       | 105        | 2.802       | 0.75  | 12.5         | 0.800 | DT + ST + SC |
|                                             | 65      | 1100       | 114        | 3.022       | 0.55  | 12.5         | 0.488 | DT + ST      |
|                                             | 65      | 1100       | 127        | 3.362       | 0.55  | 12.5         | 0.488 | DT + ST      |
|                                             | 65      | 1100       | 145        | 3.852       | 0.55  | 12.5         | 0.650 | DT + ST      |
|                                             | 65      | 1100       | 166        | 4.422       | 0.55  | 12.5         | 0.650 | DT + ST + SC |
|                                             | 65      | 1100       | 196        | 5.212       | 0.55  | 12.5         | 0.975 | DT + ST      |
|                                             | 65      | 1100       | 161        | 4.272       | 0.55  | 12.5         | 0.975 | DT + ST + SC |
|                                             | 80      | 1050       | 128        | 3.412       | 0.75  | 12.5         | 0.400 | DT + ST + SC |
|                                             | 80      | 1050       | 153        | 4.062       | 0.75  | 12.5         | 0.400 | DT + ST + SC |
|                                             | 80      | 1050       | 147        | 3.912       | 0.75  | 12.5         | 0.600 | DT + ST + SC |
|                                             | 80      | 1050       | 179        | 4.752       | 0.75  | 12.5         | 0.600 | DT + ST      |
|                                             | 80      | 1050       | 129        | 3.422       | 0.75  | 12.5         | 0.800 | DT + ST + SC |
|                                             | 80      | 1050       | 158        | 4.192       | 0.75  | 12.5         | 0.800 | DT + ST      |
|                                             | 50      | 1025       | 80         | 2.112       | 0.6   | 12.5         | 0.375 | DT + ST + SC |
|                                             | 50      | 1025       | 79         | 2.092       | 0.6   | 12.5         | 0.375 | DT + ST + SC |
|                                             | 85      | 1050       | 99         | 2.642       | 0.7   | 12.5         | 0.638 | DT + ST + SC |
|                                             | 85      | 1050       | 82         | 2.182       | 0.7   | 12.5         | 0.638 | DT + ST + SC |
|                                             | 50      | 1025       | 100        | 2.662       | 0.6   | 12.5         | 0.375 | DT + ST + SC |
|                                             | 50      | 1025       | 101        | 2.682       | 0.6   | 12.5         | 0.375 | DT + ST      |
|                                             | 85      | 1050       | 111        | 2.952       | 0.7   | 12.5         | 0.638 | DT + ST      |
|                                             | 85      | 1050       | 105        | 2.782       | 0.7   | 12.5         | 0.638 | DT + ST      |
| Sahoo & Sharma<br>2014                      | 80      | 1100       | 144        | 3.679       | 0.75  | 20.0         | 0.400 | S-FL         |
|                                             | 80      | 1100       | 109        | 2.796       | 0.75  | 20.0         | 0.600 | S            |
|                                             | 80      | 1100       | 94         | 2.407       | 0.75  | 20.0         | 0.800 | S            |
|                                             | 80      | 1100       | 115        | 2.927       | 0.75  | 20.0         | 1.000 | S            |
| Shoaib, Lubell and<br>Bindiganavile<br>2015 | 55      | 1100       | 204        | 2.549       | 0.5   | 10.0         | 0.550 | S-FL         |
|                                             | 55      | 1100       | 299        | 3.737       | 0.5   | 10.0         | 0.550 | S-FL         |
|                                             | 55      | 1100       | 312        | 1.888       | 0.5   | 10.0         | 0.550 | S-FL         |
| Manju et al<br>2017                         | 80      | 1100       | 119        | 4.841       | 0.45  | 12.0         | 0.400 | S            |
|                                             | 80      | 1100       | 156        | 6.351       | 0.45  | 12.0         | 0.800 | S            |
|                                             | 80      | 1100       | 187        | 7.641       | 0.45  | 12.0         | 1.200 | S            |
|                                             | 80      | 1100       | 63         | 2.591       | 0.45  | 12.0         | 0.400 | S            |

|                                          |    |      |     |       |       |      |       |      |
|------------------------------------------|----|------|-----|-------|-------|------|-------|------|
|                                          | 80 | 1100 | 80  | 3.271 | 0.45  | 12.0 | 0.800 | S    |
|                                          | 80 | 1100 | 136 | 5.541 | 0.45  | 12.0 | 1.200 | S    |
| <i>Arslan et al.<br/>2017</i>            | 55 | 1100 | 65  | 2.181 | 0.55  | 22.0 | 0.545 | S    |
|                                          | 55 | 1100 | 44  | 1.481 | 0.55  | 22.0 | 0.545 | S    |
|                                          | 55 | 1100 | 50  | 1.681 | 0.55  | 22.0 | 1.090 | S    |
|                                          | 55 | 1100 | 39  | 1.314 | 0.55  | 12.0 | 1.635 | S    |
|                                          | 55 | 1100 | 33  | 1.103 | 0.55  | 22.0 | 0.545 | S    |
|                                          | 55 | 1100 | 43  | 1.437 | 0.55  | 22.0 | 1.090 | S    |
|                                          | 55 | 1100 | 59  | 1.970 | 0.55  | 12.0 | 1.635 | S    |
|                                          | 55 | 1100 | 43  | 1.443 | 0.55  | 22.0 | 0.545 | S    |
|                                          | 55 | 1100 | 36  | 1.193 | 0.55  | 22.0 | 1.090 | S-FL |
| <i>Parra-Montesinos et<br/>al. 2006</i>  | 80 | 1100 | 174 | 3.011 | 0.508 | 10.0 | 0.800 | NA   |
|                                          | 60 | 1100 | 151 | 2.601 | 0.508 | 10.0 | 0.900 | NA   |
|                                          | 60 | 1100 | 191 | 3.301 | 0.508 | 10.0 | 0.900 | NA   |
|                                          | 60 | 1100 | 192 | 3.321 | 0.508 | 10.0 | 0.900 | NA   |
|                                          | 80 | 1100 | 220 | 3.801 | 0.508 | 10.0 | 0.800 | NA   |
|                                          | 60 | 1100 | 198 | 3.411 | 0.508 | 10.0 | 0.900 | NA   |
|                                          | 60 | 1100 | 149 | 2.572 | 0.508 | 10.0 | 0.600 | NA   |
|                                          | 60 | 1100 | 203 | 3.502 | 0.508 | 10.0 | 0.600 | NA   |
|                                          | 60 | 1100 | 178 | 3.072 | 0.508 | 10.0 | 0.600 | NA   |
|                                          | 60 | 1100 | 181 | 3.132 | 0.508 | 10.0 | 0.600 | NA   |
| <i>Rosenbusch &amp; Teutsch<br/>2003</i> | 67 | 1100 | 280 | 5.380 | 0.889 | 10.0 | 0.168 | NA   |
|                                          | 67 | 1100 | 300 | 5.760 | 0.889 | 10.0 | 0.509 | NA   |
|                                          | 67 | 1100 | 108 | 2.070 | 0.889 | 10.0 | 0.168 | NA   |
|                                          | 67 | 1100 | 144 | 2.770 | 0.889 | 10.0 | 0.509 | NA   |
|                                          | 67 | 1100 | 82  | 1.570 | 0.889 | 10.0 | 0.168 | NA   |
|                                          | 67 | 1100 | 107 | 2.060 | 0.889 | 10.0 | 0.509 | NA   |
|                                          | 67 | 1100 | 244 | 2.650 | 0.889 | 10.0 | 0.335 | NA   |
|                                          | 67 | 1100 | 252 | 2.740 | 0.889 | 10.0 | 0.335 | NA   |
|                                          | 67 | 1100 | 259 | 2.810 | 0.889 | 10.0 | 0.335 | NA   |
|                                          | 67 | 1100 | 263 | 2.860 | 0.889 | 10.0 | 0.335 | NA   |
|                                          | 67 | 1100 | 110 | 2.110 | 0.889 | 10.0 | 0.168 | NA   |
|                                          | 67 | 1100 | 120 | 2.310 | 0.889 | 10.0 | 0.342 | NA   |
|                                          | 67 | 1100 | 155 | 2.980 | 0.889 | 10.0 | 0.509 | NA   |
|                                          | 67 | 1100 | 111 | 2.130 | 0.889 | 10.0 | 0.335 | NA   |
|                                          | 67 | 1100 | 132 | 2.530 | 0.889 | 10.0 | 0.335 | NA   |
|                                          | 67 | 1100 | 153 | 1.420 | 0.889 | 10.0 | 0.168 | NA   |
|                                          | 67 | 1100 | 230 | 2.050 | 0.889 | 10.0 | 0.335 | NA   |
|                                          | 67 | 1100 | 82  | 1.580 | 0.889 | 10.0 | 0.168 | NA   |
|                                          | 67 | 1100 | 117 | 2.250 | 0.889 | 10.0 | 0.509 | NA   |
| <i>Sahoo et al.<br/>2016</i>             | 80 | 1100 | 149 | 4.563 | 0.75  | 10.0 | 0.600 | DT   |
|                                          | 80 | 1100 | 99  | 3.034 | 0.75  | 10.0 | 0.600 | SC   |
|                                          | 80 | 1100 | 85  | 2.606 | 0.75  | 10.0 | 0.600 | SC   |
|                                          | 65 | 2300 | 286 | 1.532 | 0.9   | 10.0 | 0.209 | S    |

|                                                             |     |      |     |       |      |      |       |      |
|-------------------------------------------------------------|-----|------|-----|-------|------|------|-------|------|
| <i>Amin &amp; Foster 2016</i><br><i>Tahenni et al. 2016</i> | 65  | 2300 | 356 | 1.907 | 0.9  | 10   | 0.447 | S    |
|                                                             | 65  | 1100 | 42  | 3.124 | 0.54 | 15.0 | 0.325 | S    |
|                                                             | 65  | 1100 | 44  | 3.295 | 0.54 | 15.0 | 0.325 | S    |
|                                                             | 65  | 1100 | 43  | 3.199 | 0.54 | 15.0 | 0.325 | S    |
|                                                             | 65  | 1100 | 45  | 3.342 | 0.54 | 15.0 | 0.650 | S-FL |
|                                                             | 65  | 1100 | 48  | 3.540 | 0.54 | 15.0 | 0.650 | S-FL |
|                                                             | 65  | 1100 | 43  | 3.187 | 0.54 | 15.0 | 0.650 | S-FL |
|                                                             | 80  | 1100 | 50  | 3.668 | 0.75 | 15.0 | 0.800 | S-FL |
|                                                             | 80  | 1100 | 52  | 3.885 | 0.75 | 15.0 | 0.800 | S-FL |
|                                                             | 80  | 1100 | 45  | 3.346 | 0.75 | 15.0 | 0.800 | S-FL |
| <i>Narayanan &amp; Darwish</i><br><i>1987</i>               | 100 | 2000 | 33  | 2.973 | 0.3  | 9.6  | 0.188 | S    |
|                                                             | 100 | 2000 | 30  | 2.685 | 0.3  | 9.6  | 0.188 | S    |
|                                                             | 100 | 2000 | 31  | 2.787 | 0.3  | 9.6  | 0.188 | S    |
|                                                             | 100 | 2000 | 30  | 2.723 | 0.3  | 9.6  | 0.188 | S    |
|                                                             | 100 | 2000 | 23  | 2.085 | 0.3  | 9.6  | 0.188 | S    |
|                                                             | 100 | 2000 | 22  | 1.957 | 0.3  | 9.6  | 0.188 | S    |
|                                                             | 133 | 2000 | 36  | 3.247 | 0.3  | 9.6  | 0.499 | S    |
|                                                             | 133 | 2000 | 22  | 1.987 | 0.3  | 9.6  | 0.499 | S    |
|                                                             | 100 | 2000 | 33  | 2.987 | 0.3  | 9.6  | 0.750 | S    |
|                                                             | 133 | 2000 | 51  | 4.633 | 0.3  | 9.6  | 0.499 | S    |
|                                                             | 133 | 2000 | 41  | 3.705 | 0.3  | 9.6  | 0.499 | S    |
|                                                             | 133 | 2000 | 29  | 2.629 | 0.3  | 9.6  | 0.499 | S    |
|                                                             | 133 | 2000 | 62  | 5.583 | 0.3  | 9.6  | 0.998 | S    |
|                                                             | 133 | 2000 | 49  | 4.435 | 0.3  | 9.6  | 0.998 | S    |
|                                                             | 133 | 2000 | 33  | 2.989 | 0.3  | 9.6  | 0.998 | S    |
|                                                             | 133 | 2000 | 32  | 2.977 | 0.3  | 9.6  | 0.499 | S    |
|                                                             | 133 | 2000 | 38  | 3.567 | 0.3  | 9.6  | 0.499 | S    |
|                                                             | 133 | 2000 | 25  | 2.257 | 0.3  | 9.6  | 0.499 | S    |
|                                                             | 133 | 2000 | 25  | 2.347 | 0.3  | 9.6  | 0.499 | S    |
|                                                             | 133 | 2000 | 48  | 4.387 | 0.3  | 9.6  | 0.998 | S    |
|                                                             | 133 | 2000 | 54  | 5.017 | 0.3  | 9.6  | 0.998 | S    |
|                                                             | 100 | 2000 | 52  | 4.867 | 0.3  | 9.6  | 1.125 | S    |
|                                                             | 100 | 2000 | 53  | 4.947 | 0.3  | 9.6  | 1.500 | S    |
|                                                             | 100 | 2000 | 49  | 4.477 | 0.3  | 9.6  | 1.125 | S    |
|                                                             | 100 | 2000 | 59  | 5.473 | 0.3  | 9.6  | 0.375 | S    |
|                                                             | 100 | 2000 | 73  | 6.783 | 0.3  | 9.6  | 0.750 | S    |
|                                                             | 100 | 2000 | 77  | 7.163 | 0.3  | 9.6  | 1.125 | S    |
|                                                             | 100 | 2000 | 68  | 6.313 | 0.3  | 9.6  | 1.500 | S    |
|                                                             | 60  | 1115 | 104 | 3.178 | 0.5  | 10.0 | 1.200 | S    |
|                                                             | 60  | 1115 | 116 | 3.536 | 0.5  | 10.0 | 0.600 | S    |
|                                                             | 60  | 1115 | 117 | 3.549 | 0.5  | 10.0 | 1.200 | S    |
| <i>Kwak et al.</i><br><i>2002</i>                           | 63  | 1079 | 135 | 5.108 | 0.8  | 19.0 | 0.313 | S-FL |
|                                                             | 63  | 1079 | 145 | 5.458 | 0.8  | 19.0 | 0.469 | S-FL |
|                                                             | 63  | 1079 | 108 | 4.058 | 0.8  | 19.0 | 0.313 | S    |

|                                    |    |      |     |       |       |      |       |             |
|------------------------------------|----|------|-----|-------|-------|------|-------|-------------|
|                                    | 63 | 1079 | 68  | 2.575 | 0.8   | 19.0 | 0.313 | S           |
| <i>Lim &amp; Oh 1999</i>           | 60 | 1303 | 59  | 4.513 | 0.7   | 10.0 | 0.300 | S           |
|                                    | 60 | 1303 | 75  | 5.753 | 0.7   | 10.0 | 0.600 | S           |
|                                    | 55 | 1100 | 172 | 2.977 | 0.54  | 10.0 | 0.413 | SC + DT + Y |
|                                    | 55 | 1100 | 162 | 2.790 | 0.54  | 10.0 | 0.413 | SC + DT + Y |
|                                    | 55 | 1100 | 171 | 2.950 | 0.54  | 10.0 | 0.550 | SC + DT + Y |
|                                    | 55 | 1100 | 174 | 3.003 | 0.54  | 10.0 | 0.550 | SC + DT + Y |
|                                    | 55 | 1100 | 150 | 2.596 | 0.54  | 10.0 | 0.825 | ST + DT + B |
|                                    | 55 | 1100 | 198 | 3.417 | 0.54  | 10.0 | 0.825 | SC + ST     |
|                                    | 55 | 1100 | 193 | 3.331 | 0.54  | 10.0 | 0.825 | ST + DT     |
|                                    | 55 | 1100 | 191 | 3.304 | 0.54  | 10.0 | 0.825 | ST + DT     |
| <i>Dinh et al. 2010</i>            | 80 | 1100 | 174 | 3.003 | 0.75  | 10.0 | 0.800 | DT          |
|                                    | 80 | 1100 | 220 | 3.805 | 0.75  | 10.0 | 0.800 | ST + DT     |
|                                    | 80 | 2300 | 194 | 3.357 | 0.375 | 10.0 | 0.600 | ST + DT + Y |
|                                    | 80 | 2300 | 191 | 3.304 | 0.375 | 10.0 | 0.600 | ST + DT + Y |
|                                    | 55 | 1100 | 369 | 2.952 | 0.54  | 10.0 | 0.413 | ST + DT     |
|                                    | 55 | 1100 | 341 | 2.725 | 0.54  | 10.0 | 0.413 | DT          |
|                                    | 80 | 1100 | 355 | 2.837 | 0.75  | 10.0 | 0.600 | SC + ST     |
|                                    | 80 | 1100 | 348 | 2.779 | 0.75  | 10.0 | 0.600 | DT          |
|                                    | 55 | 1100 | 351 | 2.808 | 0.54  | 10.0 | 0.413 | SC + ST + Y |
|                                    | 80 | 1100 | 271 | 2.169 | 0.75  | 10.0 | 0.600 | ST + DT + B |
|                                    | 80 | 1100 | 228 | 1.827 | 0.75  | 10.0 | 0.600 | ST + DT + B |
|                                    | 55 | 1100 | 438 | 3.505 | 0.54  | 10.0 | 0.825 | SC + ST + Y |
| <i>Lima Araujo et al. 2014</i>     | 65 | 1150 | 262 | 5.130 | 0.54  | 12.5 | 0.650 | NA          |
|                                    | 65 | 1150 | 292 | 5.728 | 0.54  | 12.5 | 1.300 | NA          |
| <i>Casanova et al. 1997</i>        | 75 | 1200 | 360 | 3.265 | 0.8   | 12.5 | 0.938 | NA          |
|                                    | 60 | 1200 | 360 | 3.265 | 0.5   | 12.5 | 0.750 | NA          |
|                                    | 60 | 1200 | 158 | 5.610 | 0.5   | 10.0 | 0.750 | DT          |
| <i>Aoude et al. 2012</i>           | 55 | 1100 | 48  | 1.594 | 0.55  | 10.0 | 0.275 | S           |
|                                    | 55 | 1100 | 57  | 1.891 | 0.55  | 10.0 | 0.550 | S           |
|                                    | 55 | 1100 | 161 | 1.230 | 0.55  | 10.0 | 0.275 | S           |
|                                    | 55 | 1100 | 205 | 1.563 | 0.55  | 10   | 0.550 | S           |
| <i>Minelli &amp; Plizzari 2013</i> | 50 | 1100 | 134 | 1.543 | 0.6   | 20   | 0.190 | S           |
|                                    | 50 | 1100 | 120 | 1.376 | 1     | 20   | 0.190 | S           |
|                                    | 78 | 1333 | 142 | 1.629 | 0.73  | 20   | 0.333 | S           |
|                                    | 50 | 1100 | 141 | 1.623 | 0.6   | 20   | 0.190 | S           |
|                                    | 48 | 1250 | 191 | 2.198 | 0.62  | 20   | 0.307 | S-FL        |
|                                    | 50 | 1100 | 197 | 2.163 | 1     | 15   | 0.125 | S-FL        |
|                                    | 50 | 1100 | 157 | 1.724 | 1     | 15   | 0.125 | S           |
|                                    | 50 | 1100 | 258 | 1.420 | 1     | 20   | 0.125 | S           |
|                                    | 50 | 1100 | 339 | 1.865 | 1     | 20   | 0.125 | S           |
| <i>Kang et al. 2011</i>            | 63 | 1100 | 82  | 3.126 | 0.8   | 19   | 0.313 | S-FL        |
|                                    | 63 | 1100 | 36  | 1.371 | 0.8   | 19   | 0.313 | S           |
|                                    | 63 | 1100 | 78  | 2.960 | 0.8   | 19   | 0.313 | S-FL        |



|                                       |    |      |      |       |       |    |       |      |
|---------------------------------------|----|------|------|-------|-------|----|-------|------|
| <i>Casanova &amp; Rossi<br/>1999</i>  | 60 | 1200 | 139  | 4.934 | 0.5   | 10 | 0.750 | S    |
|                                       | 60 | 1200 | 139  | 4.934 | 0.5   | 10 | 0.750 | S    |
| <i>Lim et al.<br/>1987</i>            | 60 | 1130 | 59   | 1.757 | 0.5   | 10 | 0.300 | S    |
|                                       | 60 | 1130 | 148  | 4.414 | 0.5   | 10 | 0.600 | S    |
|                                       | 60 | 1130 | 84   | 2.489 | 0.5   | 10 | 0.600 | S    |
|                                       | 60 | 1130 | 68   | 2.037 | 0.5   | 10 | 0.600 | S-FL |
|                                       | 60 | 1130 | 136  | 4.042 | 0.5   | 10 | 0.300 | S    |
|                                       | 60 | 1130 | 65   | 1.926 | 0.5   | 10 | 0.300 | S    |
|                                       | 60 | 1130 | 50   | 1.501 | 0.5   | 10 | 0.300 | S    |
| <i>Mansur et al. 1986</i>             | 60 | 1260 | 76   | 2.556 | 0.5   | 20 | 0.300 | SC   |
|                                       | 60 | 1260 | 53   | 1.800 | 0.5   | 20 | 0.300 | SC   |
|                                       | 60 | 1260 | 46   | 1.550 | 0.5   | 20 | 0.300 | DT   |
|                                       | 60 | 1260 | 86   | 2.895 | 0.5   | 20 | 0.450 | SC   |
|                                       | 60 | 1260 | 61   | 2.053 | 0.5   | 20 | 0.450 | SC   |
|                                       | 60 | 1260 | 66   | 2.223 | 0.5   | 20 | 0.450 | SC   |
|                                       | 60 | 1260 | 46   | 1.546 | 0.5   | 20 | 0.450 | SC   |
|                                       | 60 | 1260 | 61   | 2.053 | 0.5   | 20 | 0.450 | SC   |
|                                       | 60 | 1260 | 87   | 2.933 | 0.5   | 20 | 0.450 | SC   |
| <i>Zarrinpour &amp; Chao<br/>2017</i> | 67 | 1096 | 121  | 3.135 | 0.76  | 10 | 0.503 | S    |
|                                       | 67 | 1096 | 482  | 3.112 | 0.76  | 10 | 0.503 | S    |
|                                       | 67 | 1096 | 163  | 2.730 | 0.76  | 10 | 0.503 | S    |
|                                       | 67 | 1096 | 196  | 3.281 | 0.76  | 10 | 0.503 | S    |
|                                       | 67 | 1096 | 273  | 2.484 | 0.76  | 10 | 0.503 | S    |
|                                       | 67 | 1096 | 386  | 3.513 | 0.76  | 10 | 0.503 | S    |
|                                       | 67 | 1096 | 700  | 3.388 | 0.76  | 10 | 0.503 | S    |
|                                       | 67 | 1096 | 721  | 3.489 | 0.76  | 10 | 0.503 | S    |
|                                       | 67 | 1096 | 1081 | 3.171 | 0.76  | 10 | 0.503 | S    |
|                                       | 67 | 1096 | 1044 | 3.063 | 0.76  | 10 | 0.503 | S    |
| <i>Noghabai 2000</i>                  | 40 | 2600 | 300  | 8.326 | 0.15  | 16 | 0.200 | S    |
|                                       | 48 | 1850 | 296  | 8.215 | 0.375 | 16 | 0.360 | S    |
|                                       | 86 | 2200 | 253  | 7.021 | 0.7   | 16 | 0.429 | S    |
|                                       | 86 | 2200 | 263  | 7.299 | 0.7   | 16 | 0.643 | S    |
|                                       | 48 | 1850 | 190  | 4.865 | 0.375 | 16 | 0.360 | S    |
|                                       | 50 | 1100 | 311  | 6.616 | 0.6   | 16 | 0.500 | S    |
|                                       | 40 | 2600 | 364  | 7.744 | 0.15  | 16 | 0.200 | S    |
|                                       | 48 | 1850 | 408  | 8.680 | 0.375 | 16 | 0.360 | S    |
|                                       | 40 | 2600 | 293  | 3.570 | 0.15  | 18 | 0.200 | S    |
|                                       | 40 | 2600 | 340  | 4.143 | 0.15  | 18 | 0.200 | S    |
|                                       | 48 | 1850 | 371  | 4.521 | 0.375 | 18 | 0.360 | S    |
|                                       | 48 | 1850 | 331  | 4.034 | 0.375 | 18 | 0.360 | S    |
|                                       | 86 | 2200 | 268  | 3.265 | 0.7   | 18 | 0.429 | S    |
|                                       | 86 | 2200 | 316  | 3.851 | 0.7   | 18 | 0.429 | S    |
|                                       | 86 | 2200 | 343  | 4.180 | 0.7   | 18 | 0.643 | S    |
|                                       | 86 | 2200 | 296  | 3.607 | 0.7   | 18 | 0.643 | S    |
|                                       | 40 | 2600 | 458  | 2.679 | 0.15  | 18 | 0.200 | S    |

|                                     |     |      |     |        |       |     |       |    |
|-------------------------------------|-----|------|-----|--------|-------|-----|-------|----|
|                                     | 48  | 1850 | 609 | 3.562  | 0.375 | 18  | 0.360 | S  |
|                                     | 86  | 2200 | 522 | 3.053  | 0.7   | 18  | 0.643 | S  |
| <i>Randl et al. 2017</i>            | 75  | 2000 | 254 | 4.039  | 0.2   | 0.4 | 0.750 | S  |
|                                     | 75  | 2000 | 321 | 5.105  | 0.2   | 0.4 | 0.750 | S  |
|                                     | 75  | 2000 | 360 | 5.727  | 0.2   | 0.4 | 0.750 | S  |
|                                     | 75  | 2000 | 269 | 4.277  | 0.2   | 0.4 | 0.375 | S  |
|                                     | 75  | 2000 | 202 | 3.211  | 0.2   | 0.4 | 0.375 | S  |
|                                     | 75  | 2000 | 311 | 4.946  | 0.2   | 0.4 | 0.375 | S  |
| <i>Ashour et al. 1992</i>           | 75  | 260  | 46  | 1.700  | 0.8   | 10  | 0.750 | NA |
|                                     | 75  | 260  | 25  | 0.925  | 0.8   | 10  | 0.750 | NA |
|                                     | 75  | 260  | 16  | 0.605  | 0.8   | 10  | 0.750 | NA |
|                                     | 75  | 260  | 245 | 9.104  | 0.8   | 10  | 0.375 | NA |
|                                     | 75  | 260  | 130 | 4.840  | 0.8   | 10  | 0.375 | NA |
|                                     | 75  | 260  | 62  | 2.302  | 0.8   | 10  | 0.375 | NA |
|                                     | 75  | 260  | 54  | 1.995  | 0.8   | 10  | 0.375 | NA |
|                                     | 75  | 260  | 343 | 12.754 | 0.8   | 10  | 0.750 | NA |
|                                     | 75  | 260  | 163 | 6.080  | 0.8   | 10  | 0.750 | NA |
|                                     | 75  | 260  | 86  | 3.202  | 0.8   | 10  | 0.750 | NA |
|                                     | 75  | 260  | 54  | 2.005  | 0.8   | 10  | 0.750 | NA |
|                                     | 75  | 260  | 375 | 13.964 | 0.8   | 10  | 1.125 | NA |
|                                     | 75  | 260  | 194 | 7.230  | 0.8   | 10  | 1.125 | NA |
|                                     | 75  | 260  | 95  | 3.542  | 0.8   | 10  | 1.125 | NA |
|                                     | 75  | 260  | 54  | 2.025  | 0.8   | 10  | 1.125 | NA |
|                                     | 75  | 260  | 181 | 6.750  | 0.8   | 10  | 0.750 | NA |
|                                     | 75  | 260  | 105 | 3.912  | 0.8   | 10  | 0.750 | NA |
|                                     | 75  | 260  | 80  | 2.975  | 0.8   | 10  | 0.750 | NA |
| <i>Tan et al. 1993</i>              | 60  | 1100 | 219 | 4.606  | 0.5   | 19  | 0.300 | NA |
|                                     | 60  | 1100 | 182 | 3.827  | 0.5   | 19  | 0.450 | NA |
|                                     | 60  | 1100 | 212 | 4.444  | 0.5   | 19  | 0.600 | NA |
|                                     | 60  | 1100 | 155 | 3.266  | 0.5   | 19  | 0.600 | NA |
|                                     | 60  | 1100 | 308 | 6.476  | 0.5   | 19  | 0.600 | NA |
| <i>Pansuk et al. 2017</i>           | 65  | 2000 | 342 | 6.505  | 0.2   | 2   | 0.520 | NA |
|                                     | 65  | 2000 | 533 | 10.143 | 0.2   | 2   | 1.040 | NA |
| <i>Kim et al. 2017</i>              | 60  | 1336 | 118 | 1.335  | 0.5   | 10  | 0.450 | NA |
|                                     | 60  | 1336 | 208 | 2.354  | 0.5   | 10  | 0.450 | NA |
| <i>Sharma, 1986</i>                 | 85  | 1100 | 124 | 2.983  | 0.6   | 10  | 0.816 | NA |
| <i>Narayanan &amp; Darwish 1988</i> | 100 | 2000 | 351 | 10.159 | 0.3   | 5   | 0.188 | NA |
|                                     | 100 | 2000 | 326 | 9.435  | 0.3   | 5   | 0.375 | NA |
|                                     | 100 | 2000 | 362 | 10.478 | 0.3   | 5   | 0.563 | NA |
|                                     | 100 | 2000 | 397 | 11.493 | 0.3   | 5   | 0.750 | NA |
|                                     | 100 | 2000 | 394 | 11.406 | 0.3   | 5   | 0.938 | NA |
|                                     | 100 | 2000 | 455 | 13.174 | 0.3   | 5   | 0.750 | NA |
|                                     | 100 | 2000 | 405 | 11.725 | 0.3   | 5   | 0.750 | NA |
|                                     | 100 | 2000 | 343 | 9.928  | 0.3   | 5   | 0.750 | NA |
|                                     | 100 | 2000 | 345 | 9.986  | 0.3   | 5   | 0.750 | NA |
|                                     | 100 | 2000 | 295 | 8.536  | 0.3   | 5   | 0.750 | NA |

|                                      |     |      |     |       |       |      |       |      |
|--------------------------------------|-----|------|-----|-------|-------|------|-------|------|
|                                      | 100 | 2000 | 334 | 9.667 | 0.3   | 5    | 0.750 | NA   |
| <i>Li, Ward &amp; Hamza<br/>1992</i> | 29  | 1000 | 17  | 2.560 | 0.877 | 2.36 | 0.214 | NA   |
|                                      | 29  | 1000 | 51  | 1.967 | 0.877 | 2.36 | 0.214 | NA   |
|                                      | 29  | 1000 | 21  | 3.220 | 0.877 | 2.36 | 0.428 | NA   |
|                                      | 29  | 1000 | 67  | 2.577 | 0.877 | 2.36 | 0.428 | NA   |
|                                      | 29  | 1000 | 18  | 2.750 | 0.877 | 2.36 | 0.214 | NA   |
|                                      | 29  | 1000 | 62  | 2.387 | 0.877 | 2.36 | 0.214 | NA   |
|                                      | 29  | 1000 | 51  | 7.823 | 0.877 | 2.36 | 0.214 | NA   |
|                                      | 29  | 1000 | 33  | 5.155 | 0.877 | 2.36 | 0.214 | NA   |
|                                      | 29  | 1000 | 30  | 4.646 | 0.877 | 2.36 | 0.214 | NA   |
|                                      | 29  | 1000 | 26  | 3.996 | 0.877 | 2.36 | 0.214 | NA   |
|                                      | 29  | 1000 | 23  | 3.627 | 0.877 | 2.36 | 0.214 | NA   |
|                                      | 29  | 1000 | 21  | 3.178 | 0.877 | 2.36 | 0.214 | NA   |
|                                      | 29  | 1000 | 18  | 2.759 | 0.877 | 2.36 | 0.214 | NA   |
|                                      | 29  | 1000 | 13  | 1.990 | 0.877 | 2.36 | 0.214 | NA   |
|                                      | 29  | 1000 | 18  | 2.760 | 0.877 | 2.36 | 0.214 | NA   |
|                                      | 57  | 1000 | 25  | 3.910 | 0.877 | 2.36 | 0.428 | NA   |
|                                      | 60  | 1172 | 79  | 3.067 | 0.5   | 9    | 0.600 | NA   |
|                                      | 60  | 1172 | 21  | 3.170 | 0.5   | 9    | 0.600 | NA   |
|                                      | 60  | 1172 | 16  | 2.440 | 0.5   | 9    | 0.600 | NA   |
|                                      | 60  | 1172 | 37  | 5.645 | 0.5   | 9    | 0.600 | NA   |
|                                      | 100 | 1172 | 79  | 3.067 | 0.5   | 9    | 1.000 | NA   |
|                                      | 100 | 1172 | 23  | 3.560 | 0.5   | 9    | 1.000 | NA   |
| <i>Swamy et al. 1993</i>             | 100 | 1570 | 81  | 5.538 | 0.5   | 14   | 0.750 | S    |
|                                      | 100 | 1570 | 59  | 4.077 | 0.5   | 14   | 0.750 | S    |
|                                      | 100 | 1570 | 43  | 2.945 | 0.5   | 14   | 0.750 | S    |
|                                      | 100 | 1570 | 72  | 4.962 | 0.5   | 14   | 0.750 | S    |
|                                      | 100 | 1570 | 46  | 3.158 | 0.5   | 14   | 0.750 | S    |
|                                      | 100 | 1570 | 43  | 2.965 | 0.5   | 14   | 0.750 | S-FL |
|                                      | 100 | 1570 | 68  | 4.681 | 0.5   | 14   | 0.750 | S-FL |
| <i>Adebar et al. 1997</i>            | 60  | 1200 | 278 | 3.306 | 0.5   | 14   | 0.450 | S    |
|                                      | 60  | 1200 | 326 | 3.878 | 0.5   | 14   | 0.900 | S    |
|                                      | 60  | 1200 | 206 | 2.449 | 0.5   | 14   | 0.240 | S    |
|                                      | 60  | 1200 | 234 | 2.782 | 0.5   | 14   | 0.360 | S    |
|                                      | 60  | 1200 | 249 | 2.961 | 0.5   | 14   | 0.240 | S    |
|                                      | 60  | 1200 | 239 | 2.842 | 0.5   | 14   | 0.360 | S    |
| <i>Cho &amp; Kim 2003</i>            | 60  | 1100 | 61  | 3.041 | 0.6   | 13   | 0.300 | S    |
|                                      | 60  | 1100 | 80  | 3.961 | 0.6   | 13   | 0.600 | S-FL |
|                                      | 60  | 1100 | 85  | 4.205 | 0.6   | 13   | 0.900 | S-FL |
|                                      | 60  | 1100 | 95  | 4.747 | 0.6   | 13   | 0.300 | S-FL |
|                                      | 60  | 1100 | 103 | 5.135 | 0.6   | 13   | 0.600 | S-FL |
|                                      | 60  | 1100 | 179 | 8.906 | 0.6   | 13   | 0.300 | S    |
|                                      | 60  | 1100 | 170 | 8.444 | 0.6   | 13   | 0.600 | S    |
|                                      | 60  | 1100 | 187 | 9.299 | 0.6   | 13   | 0.900 | S    |
|                                      | 60  | 1100 | 158 | 7.866 | 0.6   | 13   | 0.300 | S    |
|                                      | 60  | 1100 | 163 | 8.110 | 0.6   | 13   | 0.600 | S-FL |

|                                                |           |             |            |              |             |           |              |             |
|------------------------------------------------|-----------|-------------|------------|--------------|-------------|-----------|--------------|-------------|
|                                                | 60        | 1100        | 154        | 7.648        | 0.6         | 13        | 0.300        | S           |
|                                                | 60        | 1100        | 171        | 8.498        | 0.6         | 13        | 0.600        | S-FL        |
| <i>Greenough &amp; Nehdi<br/>2008</i>          | 50        | 1100        | 92         | 1.742        | 1           | 10        | 0.250        | S           |
|                                                | 50        | 1100        | 107        | 2.021        | 1           | 10        | 0.375        | S           |
|                                                | 50        | 1100        | 150        | 2.838        | 1           | 10        | 0.500        | S           |
|                                                | 50        | 1100        | 117        | 2.207        | 1           | 10        | 0.125        | S           |
|                                                | 50        | 1100        | 146        | 2.747        | 1           | 10        | 0.188        | S           |
|                                                | 50        | 1100        | 148        | 2.797        | 1           | 10        | 0.250        | S           |
|                                                | 43        | 1100        | 108        | 2.042        | 0.7         | 10        | 0.107        | S           |
|                                                | 43        | 1100        | 124        | 2.347        | 0.7         | 10        | 0.161        | S           |
|                                                | 43        | 1100        | 153        | 2.884        | 0.7         | 10        | 0.214        | S           |
|                                                |           |             |            |              |             |           |              |             |
| <i>Kang et al. 2012</i>                        | 80        | 1100        | 134        | 2.158        | 0.75        | 9.5       | 0.300        | S           |
|                                                | 80        | 1100        | 223        | 3.911        | 0.75        | 9.5       | 0.300        | S           |
| <i><u>Dupont &amp; Vandewalle<br/>2003</u></i> | <u>65</u> | <u>1100</u> | <u>111</u> | <u>2.141</u> | <u>0.92</u> | <u>14</u> | <u>0.163</u> | <u>S</u>    |
|                                                | <u>65</u> | <u>1100</u> | <u>121</u> | <u>2.334</u> | <u>0.92</u> | <u>14</u> | <u>0.325</u> | <u>S</u>    |
|                                                | <u>65</u> | <u>1100</u> | <u>156</u> | <u>3.007</u> | <u>0.92</u> | <u>14</u> | <u>0.488</u> | <u>S</u>    |
|                                                | <u>65</u> | <u>1100</u> | <u>282</u> | <u>5.418</u> | <u>0.92</u> | <u>14</u> | <u>0.163</u> | <u>S</u>    |
|                                                | <u>65</u> | <u>1100</u> | <u>302</u> | <u>5.802</u> | <u>0.92</u> | <u>14</u> | <u>0.488</u> | <u>S</u>    |
|                                                | <u>65</u> | <u>1100</u> | <u>84</u>  | <u>1.607</u> | <u>0.92</u> | <u>14</u> | <u>0.163</u> | <u>S</u>    |
|                                                | <u>65</u> | <u>1100</u> | <u>110</u> | <u>2.094</u> | <u>0.92</u> | <u>14</u> | <u>0.488</u> | <u>S</u>    |
|                                                | <u>65</u> | <u>1100</u> | <u>110</u> | <u>2.110</u> | <u>0.92</u> | <u>14</u> | <u>0.163</u> | <u>S</u>    |
|                                                | <u>65</u> | <u>1100</u> | <u>146</u> | <u>2.802</u> | <u>0.92</u> | <u>14</u> | <u>0.488</u> | <u>S</u>    |
|                                                | <u>65</u> | <u>1100</u> | <u>84</u>  | <u>1.620</u> | <u>0.92</u> | <u>14</u> | <u>0.163</u> | <u>S</u>    |
|                                                | <u>65</u> | <u>1100</u> | <u>119</u> | <u>2.283</u> | <u>0.92</u> | <u>14</u> | <u>0.488</u> | <u>S</u>    |
|                                                | <u>45</u> | <u>1100</u> | <u>102</u> | <u>1.941</u> | <u>1.11</u> | <u>14</u> | <u>0.113</u> | <u>S</u>    |
|                                                | <u>45</u> | <u>1100</u> | <u>122</u> | <u>2.323</u> | <u>1.11</u> | <u>14</u> | <u>0.338</u> | <u>S</u>    |
|                                                | <u>45</u> | <u>1100</u> | <u>102</u> | <u>1.956</u> | <u>1.11</u> | <u>14</u> | <u>0.113</u> | <u>S</u>    |
|                                                | <u>45</u> | <u>1100</u> | <u>122</u> | <u>2.341</u> | <u>1.11</u> | <u>14</u> | <u>0.338</u> | <u>S</u>    |
|                                                | <u>65</u> | <u>1100</u> | <u>132</u> | <u>2.514</u> | <u>0.92</u> | <u>14</u> | <u>0.325</u> | <u>S</u>    |
|                                                | <u>65</u> | <u>1100</u> | <u>159</u> | <u>3.062</u> | <u>0.92</u> | <u>14</u> | <u>0.325</u> | <u>S</u>    |
|                                                | <u>80</u> | <u>1100</u> | <u>149</u> | <u>2.848</u> | <u>0.63</u> | <u>14</u> | <u>0.400</u> | <u>S</u>    |
|                                                | <u>80</u> | <u>1100</u> | <u>165</u> | <u>2.702</u> | <u>0.75</u> | <u>14</u> | <u>0.456</u> | <u>S</u>    |
|                                                | <u>80</u> | <u>1100</u> | <u>165</u> | <u>2.702</u> | <u>0.75</u> | <u>14</u> | <u>0.304</u> | <u>S-FL</u> |
|                                                |           |             |            |              |             |           |              |             |
| <i>Swamy &amp; Bahia 1985</i>                  | 100       | 1050        | 81         | 2.205        | 0.5         | 10        | 0.300        | DT          |
|                                                | 100       | 1050        | 116        | 3.144        | 0.5         | 10        | 0.600        | S + SC      |
|                                                | 100       | 1050        | 117        | 3.171        | 0.5         | 10        | 0.900        | S + SC      |
|                                                | 100       | 1050        | 120        | 3.258        | 0.5         | 10        | 0.600        | SC + FL     |
|                                                | 100       | 1050        | 71         | 1.919        | 0.5         | 10        | 0.600        | DT          |
| <i>tson et al. 1972</i>                        | 102       | 1100        | 28         | 2.200        | 0.25        | 2         | 0.112        | S-FL        |
|                                                | 102       | 1100        | 28         | 2.165        | 0.25        | 2         | 0.112        | S-FL        |
|                                                | 102       | 1100        | 27         | 2.124        | 0.25        | 2         | 0.112        | S-FL        |
|                                                | 46        | 1100        | 28         | 2.220        | 0.41        | 2         | 0.077        | S-FL        |
|                                                | 46        | 1100        | 28         | 2.220        | 0.41        | 2         | 0.077        | S-FL        |
|                                                | 46        | 1100        | 27         | 2.083        | 0.41        | 2         | 0.077        | S-FL        |
|                                                | 102       | 1100        | 27         | 2.110        | 0.25        | 2         | 0.112        | S-FL        |
|                                                | 102       | 1100        | 32         | 2.489        | 0.25        | 2         | 0.112        | S           |

|                         |     |      |     |        |       |    |       |      |
|-------------------------|-----|------|-----|--------|-------|----|-------|------|
|                         | 102 | 1100 | 32  | 2.483  | 0.25  | 2  | 0.112 | S    |
|                         | 102 | 1100 | 28  | 2.200  | 0.25  | 2  | 0.112 | S    |
|                         | 102 | 1100 | 25  | 1.986  | 0.25  | 2  | 0.112 | S    |
|                         | 102 | 1100 | 30  | 2.331  | 0.25  | 2  | 0.112 | S    |
|                         | 102 | 1100 | 28  | 2.207  | 0.25  | 2  | 0.112 | S    |
|                         | 102 | 1100 | 33  | 2.593  | 0.25  | 2  | 0.224 | S-FL |
|                         | 102 | 1100 | 33  | 2.607  | 0.25  | 2  | 0.224 | S    |
|                         | 102 | 1100 | 31  | 2.455  | 0.25  | 2  | 0.224 | S    |
|                         | 102 | 1100 | 33  | 2.607  | 0.25  | 2  | 0.224 | S    |
|                         | 102 | 1100 | 29  | 2.234  | 0.25  | 2  | 0.112 | S    |
|                         | 102 | 1100 | 27  | 2.124  | 0.25  | 2  | 0.112 | S    |
|                         | 62  | 1100 | 30  | 2.372  | 0.41  | 2  | 0.102 | S    |
|                         | 62  | 1100 | 31  | 2.379  | 0.41  | 2  | 0.102 | S    |
|                         | 62  | 1100 | 33  | 2.607  | 0.41  | 2  | 0.102 | S    |
|                         | 62  | 1100 | 26  | 2.041  | 0.41  | 2  | 0.102 | S    |
|                         | 62  | 1100 | 27  | 2.138  | 0.41  | 2  | 0.102 | S    |
|                         | 62  | 1100 | 26  | 2.027  | 0.41  | 2  | 0.102 | S    |
|                         | 62  | 1100 | 25  | 1.924  | 0.41  | 2  | 0.102 | S    |
|                         | 62  | 1100 | 23  | 1.765  | 0.41  | 2  | 0.102 | S    |
|                         | 62  | 1100 | 32  | 2.476  | 0.41  | 2  | 0.204 | S    |
|                         | 62  | 1100 | 34  | 2.655  | 0.41  | 2  | 0.204 | S    |
|                         | 62  | 1100 | 30  | 2.372  | 0.41  | 2  | 0.204 | S    |
|                         | 62  | 1100 | 33  | 2.558  | 0.41  | 2  | 0.204 | S    |
|                         | 62  | 1100 | 37  | 2.883  | 0.41  | 2  | 0.409 | S    |
|                         | 62  | 1100 | 35  | 2.696  | 0.41  | 2  | 0.409 | S    |
|                         | 62  | 1100 | 33  | 2.607  | 0.41  | 2  | 0.409 | S    |
|                         | 62  | 1100 | 42  | 3.289  | 0.41  | 2  | 0.409 | S    |
|                         | 62  | 1100 | 40  | 3.103  | 0.41  | 2  | 0.409 | S    |
|                         | 62  | 1100 | 57  | 4.407  | 0.41  | 2  | 0.818 | S-FL |
|                         | 62  | 1100 | 77  | 6.027  | 0.41  | 2  | 0.818 | S    |
|                         | 62  | 1100 | 145 | 11.338 | 0.41  | 2  | 0.818 | S    |
|                         | 62  | 1100 | 140 | 10.889 | 0.41  | 2  | 0.818 | S    |
|                         | 62  | 1100 | 25  | 1.917  | 0.41  | 2  | 0.102 | S    |
|                         | 62  | 1100 | 24  | 1.848  | 0.41  | 2  | 0.102 | S    |
|                         | 62  | 1100 | 26  | 2.055  | 0.41  | 2  | 0.102 | S    |
| <i>Zhao et al. 2018</i> | 35  | 700  | 114 | 2.921  | 0.92  | 20 | 0.088 | S    |
|                         | 35  | 700  | 139 | 3.577  | 0.92  | 20 | 0.175 | S    |
|                         | 35  | 700  | 157 | 4.024  | 0.92  | 20 | 0.263 | S    |
|                         | 35  | 700  | 150 | 3.853  | 0.92  | 20 | 0.350 | S    |
| <i>Jindal 1984</i>      | 25  | 4913 | 21  | 1.670  | 0.282 | 2  | 0.125 | S    |
|                         | 100 | 2350 | 30  | 2.335  | 0.25  | 2  | 0.500 | S    |
|                         | 100 | 2350 | 30  | 2.335  | 0.25  | 2  | 0.500 | S    |
|                         | 83  | 2350 | 40  | 3.165  | 0.15  | 2  | 0.417 | S    |
|                         | 83  | 2350 | 29  | 2.283  | 0.15  | 2  | 0.417 | S    |
|                         | 83  | 2350 | 25  | 1.950  | 0.15  | 2  | 0.417 | S    |
|                         | 63  | 2350 | 33  | 2.604  | 0.4   | 2  | 0.313 | S    |

|                                                          |     |      |     |        |       |       |       |      |
|----------------------------------------------------------|-----|------|-----|--------|-------|-------|-------|------|
| <b><i>Shin, Oh &amp; Ghosh<br/>1994</i></b>              | 100 | 1856 | 120 | 6.850  | 0.4   | 13    | 0.250 | S    |
|                                                          | 100 | 1856 | 130 | 7.410  | 0.4   | 13    | 0.500 | S    |
|                                                          | 100 | 1856 | 56  | 3.205  | 0.4   | 13    | 0.250 | S    |
|                                                          | 100 | 1856 | 72  | 4.115  | 0.4   | 13    | 0.500 | S    |
|                                                          | 100 | 1856 | 49  | 2.803  | 0.4   | 13    | 0.250 | S    |
|                                                          | 100 | 1856 | 61  | 3.463  | 0.4   | 13    | 0.500 | S    |
| <b><i>Imam, Vandewalle &amp;<br/>Mortelmans 1994</i></b> | 75  | 2000 | 531 | 8.852  | 0.8   | 10    | 0.563 | S-FL |
|                                                          | 75  | 2000 | 287 | 4.787  | 0.8   | 10    | 0.563 | SC   |
|                                                          | 75  | 2000 | 212 | 3.527  | 0.8   | 10    | 0.563 | DT   |
|                                                          | 75  | 2000 | 215 | 3.578  | 0.8   | 10    | 0.563 | DT   |
| <b><i>Huang et al. 2005 [106]</i></b>                    | 47  | 700  | 254 | 6.639  | 0.66  | 20    | 0.233 | SC   |
| <b><i>Kwak, Suh &amp; Hsu<br/>1991</i></b>               | 100 | 1100 | 137 | 3.172  | 0.508 | 9.525 | 1.000 | S    |
|                                                          | 100 | 1100 | 146 | 3.379  | 0.508 | 9.525 | 1.000 | S    |
|                                                          | 100 | 1100 | 134 | 3.121  | 0.508 | 9.525 | 2.000 | S    |
|                                                          | 100 | 1100 | 139 | 3.224  | 0.508 | 9.525 | 2.000 | S    |
| <b><i>Roberts &amp; Ho 1982</i></b>                      | 100 | 1100 | 33  | 3.871  | 0.38  | 10    | 1.500 | S-FL |
|                                                          | 100 | 1100 | 36  | 4.271  | 0.38  | 10    | 2.250 | S-FL |
|                                                          | 100 | 1100 | 51  | 5.996  | 0.38  | 10    | 1.500 | S-FL |
|                                                          | 100 | 1100 | 54  | 6.385  | 0.38  | 10    | 2.250 | S-FL |
|                                                          | 100 | 1100 | 81  | 9.557  | 0.38  | 10    | 1.500 | S    |
|                                                          | 100 | 1100 | 108 | 12.663 | 0.38  | 10    | 2.250 | S-FL |
| <b><i>Hwang et al. 2013</i></b>                          | 60  | 1200 | 31  | 1.866  | 0.5   | 10    | 0.300 | DT   |
|                                                          | 60  | 1200 | 52  | 3.165  | 0.5   | 10    | 0.600 | DT   |
|                                                          | 60  | 1200 | 54  | 3.285  | 0.5   | 10    | 0.900 | DT   |
|                                                          | 60  | 1200 | 48  | 2.893  | 0.5   | 10    | 1.200 | DT   |
|                                                          | 60  | 1200 | 74  | 4.662  | 0.5   | 10    | 0.600 | DT   |
|                                                          | 60  | 1200 | 73  | 4.596  | 0.5   | 10    | 0.300 | DT   |
|                                                          | 60  | 1200 | 82  | 5.127  | 0.5   | 10    | 0.600 | SC   |
| <b><i>Spinella et al.2012</i></b>                        | 55  | 1100 | 115 | 3.496  | 0.55  | 10    | 0.545 | S    |
|                                                          | 55  | 1100 | 142 | 4.319  | 0.55  | 10    | 0.545 | S    |
| <b><i>Chalioris &amp; Sfiri, 2011</i></b>                | 75  | 1100 | 43  | 1.565  | 0.8   | 9.5   | 0.375 | S    |
| <b><i>Cohen &amp; Aoude, 2012</i></b>                    | 55  | 1100 | 44  | 1.670  | 0.55  | 10    | 0.273 | S    |
| <b><i>Aoude &amp; Cohen 2014</i></b>                     | 80  | 1100 | 46  | 1.733  | 0.375 | 10    | 0.400 | S    |
|                                                          | 55  | 1100 | 45  | 1.712  | 0.55  | 10    | 0.413 | S    |
|                                                          | 55  | 1100 | 59  | 2.245  | 0.55  | 10    | 0.550 | S    |
|                                                          | 55  | 1100 | 60  | 2.283  | 0.55  | 12    | 0.550 | S    |
| <b><i>Qissab &amp; Salman 2018</i></b>                   | 63  | 1100 | 73  | 5.241  | 0.8   | 12.5  | 0.313 | S    |
|                                                          | 63  | 1100 | 87  | 6.220  | 0.8   | 12.5  | 0.469 | S    |
|                                                          | 63  | 1100 | 41  | 2.912  | 0.8   | 12.5  | 0.313 | S    |
|                                                          | 63  | 1100 | 51  | 3.652  | 0.8   | 12.5  | 0.469 | S-FL |
|                                                          | 63  | 1100 | 107 | 7.112  | 0.8   | 12.5  | 0.313 | S-FL |
|                                                          | 63  | 1100 | 126 | 8.401  | 0.8   | 12.5  | 0.469 | S-FL |
|                                                          | 63  | 1100 | 45  | 2.981  | 0.8   | 12.5  | 0.313 | S    |
|                                                          | 63  | 1100 | 47  | 3.125  | 0.8   | 12.5  | 0.469 | S    |
|                                                          | 63  | 1100 | 42  | 2.489  | 0.8   | 12.5  | 0.313 | S    |
|                                                          | 63  | 1100 | 22  | 1.272  | 0.8   | 12.5  | 0.313 | S    |

|                                                           |     |      |      |       |      |      |       |      |
|-----------------------------------------------------------|-----|------|------|-------|------|------|-------|------|
|                                                           | 63  | 1100 | 51   | 2.100 | 0.8  | 12.5 | 0.313 | S    |
| <b><i>Furlan &amp; de Hanai<br/>1997</i></b>              | 127 | 1100 | 20   | 2.359 | 0.2  | 10   | 0.953 | ST   |
|                                                           | 127 | 1100 | 22   | 2.594 | 0.2  | 10   | 1.905 | S-FL |
|                                                           | 191 | 1100 | 22   | 2.535 | 0.2  | 10   | 1.429 | ST   |
|                                                           | 191 | 1100 | 19   | 2.183 | 0.2  | 10   | 1.429 | ST   |
|                                                           | 191 | 1100 | 20   | 2.359 | 0.2  | 10   | 2.858 | ST   |
|                                                           | 191 | 1100 | 23   | 2.652 | 0.2  | 10   | 0.714 | ST   |
|                                                           | 191 | 1100 | 18   | 2.066 | 0.2  | 10   | 0.714 | ST   |
| <b><i>Dancygier &amp; Savir<br/>2011</i></b>              | 64  | 1000 | 202  | 3.704 | 0.55 | 22   | 0.477 | S    |
|                                                           | 67  | 1000 | 211  | 3.863 | 0.9  | 22   | 0.500 | S    |
| <b><i>Krassowska &amp; Kosior-<br/>Kazberuk 2018</i></b>  | 50  | 800  | 33   | 2.493 | 1    | 4    | 0.500 | S    |
|                                                           | 50  | 800  | 41   | 3.138 | 1    | 4    | 0.750 | S    |
| <b><i>Yoo &amp; Yang 2018</i></b>                         | 65  | 1400 | 417  | 3.313 | 0.55 | 20   | 0.488 | S    |
|                                                           | 65  | 1400 | 815  | 2.795 | 0.55 | 20   | 0.488 | S    |
|                                                           | 65  | 1400 | 1481 | 2.783 | 0.55 | 20   | 0.488 | S    |
| <b><i>Gali &amp; Subramaniam<br/>2017</i></b>             | 80  | 1225 | 79   | 2.864 | 0.75 | 10   | 0.400 | S    |
|                                                           | 80  | 1225 | 86   | 3.116 | 0.75 | 10   | 0.400 | S    |
| <b><i>Zamanzadeh et al.<br/>2015</i></b>                  | 58  | 1100 | 82   | 4.316 | 0.25 | 10   | 0.335 | S    |
|                                                           | 58  | 1100 | 96   | 3.240 | 0.25 | 10   | 0.335 | S    |
|                                                           | 58  | 1100 | 110  | 2.710 | 0.25 | 10   | 0.335 | S    |
| <b><i>Shoaib, Lubell &amp;<br/>Bindiganavile 2014</i></b> | 55  | 1100 | 212  | 2.649 | 0.55 | 10   | 0.545 | S    |
|                                                           | 55  | 1100 | 282  | 3.787 | 0.55 | 10   | 0.545 | S    |
| <b><i>Shoaib, 2012</i></b>                                | 55  | 1100 | 279  | 3.486 | 0.55 | 10   | 0.545 | S-FL |
|                                                           | 55  | 1100 | 459  | 6.172 | 0.55 | 10   | 0.545 | S-FL |
|                                                           | 55  | 1100 | 255  | 1.602 | 0.55 | 10   | 0.545 | S    |
|                                                           | 55  | 1100 | 245  | 1.562 | 0.55 | 10   | 0.545 | S    |
|                                                           | 55  | 1100 | 447  | 2.849 | 0.55 | 10   | 0.545 | S    |
|                                                           | 55  | 1100 | 500  | 1.805 | 0.55 | 10   | 0.545 | S    |
|                                                           | 55  | 1100 | 505  | 1.829 | 0.55 | 10   | 0.545 | S    |
|                                                           | 55  | 1100 | 653  | 2.359 | 0.55 | 10   | 0.545 | S    |
|                                                           | 55  | 1100 | 651  | 2.359 | 0.55 | 10   | 0.545 | S    |
| <b><i>Bae, Choi &amp; Choi 2014</i></b>                   | 55  | 1100 | 374  | 6.225 | 0.55 | 2    | 1.091 | S    |
|                                                           | 55  | 1100 | 587  | 9.776 | 0.55 | 2    | 1.091 | S    |
| <b><i>Abdul-Zaher et al.<br/>2016</i></b>                 | 50  | 834  | 127  | 3.969 | 1    | 20   | 0.075 | S    |
|                                                           | 50  | 834  | 133  | 4.172 | 1    | 20   | 0.150 | S    |
|                                                           | 50  | 834  | 146  | 4.578 | 1    | 20   | 0.225 | S    |
